1

2 **Selection for increased tibia length in mice alters skull shape**  
3 **through parallel changes in developmental mechanisms**

4

5

6

7 Colton M. Unger<sup>1,3</sup>, Jay Devine<sup>4</sup>, Benedikt Hallgrímsson<sup>3,4,5</sup>, and Campbell Rolian<sup>2,3\*</sup>

8

9

10

11 <sup>1</sup>Department of Biological Sciences, University of Calgary, Calgary, AB T2N 4N1, Canada.

12 <sup>2</sup>Department of Comparative Biology and Experimental Medicine, Faculty of Veterinary  
13 Medicine, University of Calgary, AB T2N4N1, Canada.

14 <sup>3</sup>McCaig Institute for Bone and Joint Health, Calgary, AB T2N4N1, Canada.

15 <sup>4</sup>Department of Cell Biology and Anatomy, University of Calgary, Calgary, AB, Canada.

16 <sup>5</sup>Alberta Children's Hospital Research Institute for Child and Maternal Health, University of  
17 Calgary, Calgary, AB, Canada.

18

19

20 \*Corresponding author: Tel.: +1 (403) 210-3888 or Email: [cprolian@ucalgary.ca](mailto:cprolian@ucalgary.ca)

21

22

## 23 **Abstract**

24 Many bones in the vertebrate skeleton, including the limb bones, axial skeleton, and bones of the  
25 floor of the cranium, grow through the process of endochondral ossification, under the control of  
26 growth plates. The cellular and molecular mechanisms of endochondral ossification are  
27 conserved across these cartilaginous growth plates, increasing the tendency of skeletal elements  
28 to covary in size and shape. Covariation at the phenotypic, developmental, and genetic levels has  
29 been hypothesized to lead to correlated changes in parts of the skeleton not under direct  
30 selection. We tested this hypothesis using the selectively bred Longshanks mouse, in which the  
31 sole target of selection was relative tibia length. We use x-ray micro-computed tomography  
32 ( $\mu$ CT) and geometric morphometrics in a large, multi-generation sample of Longshanks and  
33 random-bred wildtype mice to characterize shape changes in the Longshanks cranium. We show  
34 that Longshanks skulls became longer, flatter, and narrower in a stepwise intergenerational  
35 process. Moreover, we show that these morphological changes likely resulted from underlying  
36 developmental changes in the growth plates of the cranial base, that mirror changes in the  
37 process of endochondral ossification observed in Longshanks' tibia growth plate. Taken  
38 together, these results show that indirect, and potentially non-adaptive, skeletal changes can  
39 occur due to developmental overlap among distant anatomical elements, with important  
40 implications for interpreting the evolutionary history of vertebrate skeletal form.

41

42

43

44

## 45 **Introduction**

46 Organismal development is a major determinant of phenotypic variation, and therefore is  
47 fundamentally related to how organisms evolve (Hendrikse, Parsons and Hallgrímsson, 2007;  
48 Hallgrímsson and Lieberman, 2008). Organisms are comprised of interrelated anatomical  
49 elements whose morphology is patterned by shared genetic pathways (i.e., pleiotropic genes) and  
50 often by the same developmental processes (Hallgrímsson and Hall, 2005; Murren, 2012).  
51 Shared genetic and/or developmental processes lead to morphological integration, that is, the  
52 tendency of sets of traits to covary more strongly internally than with traits in other sets  
53 (Cheverud, 1996). In turn, integrated individual anatomical structures contribute to the modular  
54 organization of biological systems (Wagner, Pavlicev and Cheverud, 2007; Hallgrímsson *et al.*,  
55 2009).

56 If two anatomical structures are integrated due to underlying genetic phenomena, such as  
57 pleiotropy or linkage disequilibrium, then those traits are more likely to respond to selection in a  
58 concerted manner (Armbruster and Schwaegerle, 1996; Cheverud, 1996). As a result of  
59 integration, correlated responses to selection can result in phenotypic changes in some traits that  
60 are merely a consequence of covariation with other traits under selection (Gould and Lewontin,  
61 1979; Wagner, 1984; Price and Langen, 1992; Parsons *et al.*, 2015). Understanding how  
62 developmental processes lead to correlated responses to selection is pivotal to distinguishing  
63 adaptive changes from those that are non-adaptive, or potentially even maladaptive, in analyses  
64 of phylogeny, ancestral relationships and evolutionary change within lineages (Gould and  
65 Lewontin, 1979; Riska, 1986; von Cramon-Taubadel, 2019).

66 The bones of the terrestrial vertebrate cranial floor (basicranium) and the postcranial skeleton  
67 represent an interesting case of integration because they are physically distant, yet both develop

68 by the process of endochondral ossification (EO) (De Beer, 1937; White and Wallis, 2001;  
69 Mackie *et al.*, 2008). There is therefore the potential for evolutionary changes in one structure to  
70 cause correlated phenotypic changes in the other. EO proceeds through the formation, expansion,  
71 and mineralization of a cartilaginous template, known as an anlage, that is patterned *in utero* and  
72 undergoes post-natal longitudinal expansion (Kronenberg, 2003; Mackie *et al.*, 2008; Lefebvre  
73 and Bhattaram, 2010; Roselló-Díez and Joyner, 2015). In the limbs, ossification initiates by the  
74 formation of primary and secondary ossification centers and continues into post-natal  
75 development via specialized growth plates situated at the ends of the long bones (Kronenberg,  
76 2003; Mackie *et al.*, 2008; Lefebvre and Bhattaram, 2010). The postcranial growth plate, once  
77 formed, is comprised of three histologically distinct zones containing cartilage-producing cells  
78 (chondrocytes) in different physiological states: resting, proliferative, and hypertrophic (Roselló-  
79 Díez and Joyner, 2015).

80 The basicranium is comprised of three bones: the basioccipital, the basisphenoid, and the  
81 presphenoid, which make up the floor of the caudal portion of the skull in mammals and are  
82 formed by growth in the speno-occipital (SOS) and intersphenoidal (ISS) synchondroses (Wei  
83 *et al.*, 2016). Synchondroses are structurally analogous to growth plates, however, synchondroses  
84 grow bidirectionally and have duplicated proliferative and hypertrophic zones (Wei *et al.*, 2016).  
85 Basicranial growth is thought to be a key determinant of overall skull shape. The basicranium is  
86 the first cranial skeletal element to develop and is controlled intrinsically by EO-like  
87 mechanisms, whereas the face and calvarium are influenced by, and grow in response to,  
88 hormonal regulation of surrounding tissue and brain growth, respectively (Scott, 1958; Waters  
89 and Kaye, 2002; Bastir and Rosas, 2006; Richtsmeier *et al.*, 2006). Additionally, the basicranium

90 supports the brain and contains critical foramina for the passage of vasculature and cranial nerves  
91 and is therefore central to proper craniofacial development (Lieberman *et al.*, 2008).

92 Here, we used the Longshanks mouse to study correlated evolution of cranial and post-cranial  
93 skeletal elements. The Longshanks mouse was established through artificial selection for  
94 increased tibia length relative to body mass, using an outbred CD1 stock. By generation 20,  
95 mean tibia length in two independently selected Longshanks lines had increased by 13-15% in  
96 comparison to random-bred Controls from the same genetic background with no change in  
97 average body mass (Marchini *et al.*, 2014; Castro *et al.*, 2019). Investigation of the cellular  
98 mechanisms governing limb development in Longshanks revealed structural alterations in the  
99 postnatal epiphyseal growth plate of the tibia. Specifically, the Longshanks selection regime  
100 resulted in larger tibial growth plates with larger resting and proliferative zones, without changes  
101 in cell division rate or timing of growth plate fusion compared to Controls (Marchini and Rolian,  
102 2018). Previous analyses also suggested the tibia selection regime resulted in mice that are  
103 skeletally larger in relation to body mass, with correlated skeletal responses at the systemic level  
104 (Sparrow *et al.*, 2017), along with potentially maladaptive changes in skeletal microarchitecture  
105 (Farooq *et al.*, 2017; Cosman, Britz and Rolian, 2019).

106 The Longshanks experiment offers a unique opportunity to study correlated evolution in skeletal  
107 traits that were not directly under selection, in a model with known evolutionary history, under  
108 controlled laboratory settings. Given the underlying developmental relationship between the long  
109 bones and cranial base, we investigated whether selection for increased tibia length indirectly  
110 altered the shape of the Longshanks cranium. We tested the general hypothesis that selection for  
111 increased tibia length produced indirect responses in the cranium of Longshanks through changes  
112 to the shared process of endochondral ossification. Specifically, we predicted that Longshanks

113 crania will have a series of craniofacial morphological changes corresponding to altered  
114 synchondrosis size/architecture. To test this hypothesis, we compared the 3D shape of adult  
115 Longshanks crania from both Longshanks lines to Controls across three evenly spaced  
116 generations in the selection experiment. We also used a combination of morphometric analysis  
117 and histology to investigate cranial development in Longshanks neonates.

118

## 119 **Materials and Methods**

### 120 **Animal samples**

121 All animal procedures were approved by the Health Sciences Animal Care Committee at the  
122 University of Calgary (AC13-0077) and (AC17-0026) and performed in accordance with best  
123 practices outlined by the Canadian Council on Animal Care. For more information on the  
124 husbandry methods and selective Longshanks breeding regimen, see Marchini *et al.* (2014).

125 We collected 8-week old, non-breeder Longshanks mice (N=327) from generations 1, 9, and 20  
126 across three experimental lines: Longshanks 1 (hereafter LS1), Longshanks 2 (LS2), and Control  
127 (CTL) to study changes in adult cranial shape at the beginning, middle, and end of the selection  
128 process, respectively (Table 1). Each group was as sex and family balanced as possible to  
129 account for differences due to sexual dimorphism and/or family diversity (Karp *et al.*, 2017). To  
130 investigate the developmental basis of the Longshanks cranium, we generated postnatal day  
131 seven (P07) neonates (N=104) from F31 Longshanks mice (Table 1). The three lines have not  
132 actively undergone artificial selection since generation F22 and are maintained as experimental  
133 populations. We selected P07 as our developmental time point as this is when Longshanks tibiae

134 are growing fastest, and the cranial skeleton is still actively growing (Vora, Camci and Cox,  
135 2016; Farooq *et al.*, 2017; Marchini and Rolian, 2018).

### 136 **X-ray Micro-Computed Tomography ( $\mu$ CT)**

137 We performed X-ray micro-computed tomography ( $\mu$ CT). We used a Skyscan 1173 v1.6  $\mu$ CT  
138 scanner (Bruker, Kontich, Belgium) to acquire whole-body scans of the adults and separate scans  
139 of the neonate cranium and tibiae. We obtained adult samples from frozen archived carcasses at  
140 each generation, while F32 neonates were scanned the day they were euthanized. In addition, we  
141 scanned the corresponding right hindlimb of each neonate that underwent cranium scanning.  
142 Adult scans were acquired at 70-80 kV and 60-75  $\mu$ A with 44.73  $\mu$ m isotropic voxels and no  
143 filter, while neonates were scanned at a resolution of 17.04  $\mu$ m isotropic voxels with otherwise  
144 identical parameters. Stack reconstructions were performed using NRecon v1.7.4.2 (Bruker,  
145 Kontich, Belgium).

### 146 **Histology**

147 We dissected neonate crania after scanning them and fixed them in 10% neutral buffered  
148 formalin (NBF) (Thermo Scientific) for 48 hours, with NBF replacement every 24 hours. Fixed  
149 cranium tissues were then transferred to a decalcifying solution (Cal-Ex II™, Fisher Chemical)  
150 for 72 hours with daily solution changes. After decalcification, a rectangular portion of the  
151 cranial base containing both basicranial synchondroses was dehydrated, embedded it in paraffin,  
152 and sectioned in the sagittal plane at 12  $\mu$ m. Sections were deparaffinized in Slide Brite™ (Jones  
153 Scientific Products, Inc.) and subsequently stained. The slides of a specimen were stained in an  
154 alternating fashion with two stains: (1) Wiegert's Iron Haematoxylin (Sigma), 0.05% Fast-Green  
155 (FCF) (Sigma), counterstained in 0.1% Safranin-o solution (Sigma); or (2) Gill's Haematoxylin

156 #3 (Sigma), rinsed in 70% ethanol, and counterstained with 1% alcoholic Eosin Y (Sigma). We  
157 imaged sagittal midline sections using an Axio Scan.Z1 slide scanner (Zeiss, Oberkochen,  
158 Germany) at 10x magnification and qualitatively evaluated differences in growth plate size and  
159 morphology.

## 160 **Landmarking**

161  $\mu$ CT adult and neonate crania scans were subjected to a novel image registration-based pipeline  
162 to automatically detect landmarks for a geometric morphometrics (GM) shape analysis (Percival  
163 *et al.*, 2019). Automated landmarking improves data standardization and can be used to quickly  
164 process very large sample sizes while reducing intraobserver errors, such as landmark placement  
165 drift (Fruciano, 2016; Devine *et al.*, 2020). Automated landmarking involves volumetric  
166 registration using a global affine alignment of the skull volumes, followed by a dense non-linear  
167 deformation between each cranium and a reference atlas. Here, the atlas is an average volume,  
168 with a standardized landmark configuration, that best minimizes intensity differences from the  
169 rest of the sample. We used 68 3D landmarks for the adults and 50 3D landmarks for the  
170 neonates (Supplementary Figure S1 and S2; Supplementary Tables S1 and S2).

171 We computed the affine transformations with a multi-resolution framework, where the  $\mu$ CT  
172 volumes are translated, scaled, rotated, and sheared at progressively higher resolutions until their  
173 affine alignment with the atlas is maximized (Lerch, Sled and Henkelman, 2010). We computed  
174 the non-linear transformations with the multi-resolution SyN (Symmetric Normalization)  
175 algorithm (Avants *et al.*, 2011), which involves symmetrically flowing an image pair into one  
176 another along a velocity field. We then recovered, concatenated, and inverted the  
177 transformations, and finally propagated the atlas landmarks along this path to the original image



178 space for analysis. All image processing was performed with the open-source MINC (Medical  
179 Imaging NetCDF) toolkit (<https://github.com/BIC-MNI/minc-toolkit-v2>).

180 In addition to investigating overall neonate cranium shape, we characterized cranial base shape  
181 with two-dimensional (2D) landmarks at the sagittal midline. We used a 12 landmark set  
182 highlighting the vertices of the developing basicranial bones which provides information about  
183 the shape of the sagittal cross-section of the basicranial synchondroses (Supplemental Figure S3;  
184 Supplementary Table S3). Landmarks at the midline were placed in Amira v.5.4.2 (Visage  
185 Imaging, Berlin, Germany) by one observer (CMU) blind to the identity of the specimens. Adult  
186 tibiae lengths were quantified in Amira by calculating the distance, in mm, between two  
187 landmarks that we placed on the distal tip of the lateral malleolus and most lateral point on the  
188 proximal epiphysis, two anatomical points that were demonstrated to have high homology and  
189 repeatability (Cosman, Sparrow and Rolian, 2016). Because neonate tibia length is not fully  
190 visible in the scans due to small or absent secondary ossification centers (Moss, 1977), neonate  
191 tibia measurements were obtained from the distance, in mm, between landmarks placed on the  
192 distal and proximal ends of the ossified tibial diaphysis on the rostral edge along the sagittal  
193 midline of the tibia.

#### 194 **Geometric Morphometrics**

195 Analyses were performed on the R/Rstudio computational platform (R Core Team, 2020). We  
196 investigated shape cranial differences by superimposing the adult and neonate landmark  
197 configurations into age-specific morphospaces via Generalized Procrustes Analysis (GPA). To  
198 study the influence of selection on cranial shape, we first corrected for confounding variables  
199 known to alter adult and neonatal morphology.

200 In the adult dataset, we controlled for the effects of sex and size. Upon regressing shape on sex,  
201 we observed that sex accounted for a small but significant amount of variation (2.2%), although  
202 there were no sex-specific differences in cranial responses to selection (data not shown). Using  
203 sex-adjusted residuals, we investigated allometry in the Longshanks cranium to parse out how  
204 much of the cranial selection response, if any, could be attributed to changes in skeletal size.  
205 While Procrustes superimposition removes scale, it does not account for differences in biological  
206 shape that are associated with size i.e. allometry (Klingenberg, 2016). Because Longshanks mice  
207 are skeletally larger in relation to body mass in the post-cranium (Sparrow *et al.*, 2017), we  
208 employed a pooled within-group analysis of covariance (ANCOVA) of cranium centroid size on  
209 body mass to determine whether the same trend exists in the Longshanks cranium. Mean  
210 centroid size after accounting for body mass was significantly different among lines at F20 ( $F =$   
211  $22.83$ ,  $p < 0.001$ ), with Longshanks LS1 and LS2 lines having larger crania than Controls  
212 (Supplementary Figure S4) (Tukey's post-hoc test, LS1vsLS2  $p = 0.460$ , LS1vsCTL  $p < 0.001$ ,  
213 LS2vsCTL  $p < 0.001$ ). There was no difference in mean centroid size, after controlling for  
214 covariation with body mass, among founder (F01) samples (Supplementary Figure S4) ( $F =$   
215  $0.1998$ ,  $p = 0.819$ ).

216 For the neonate dataset, we controlled for the effects of litter size but not sex, due to  
217 uncertainties in assigning sex anatomically in neonates. After regressing cranial size and tibia  
218 length on litter size, we observed a strong negative correlation ( $r = -0.72$ ,  $p < 0.001$ ). LS2, which  
219 had litter sizes that were  $\sim 2$  pups larger than LS1 and  $\sim 4$  pups larger than controls on average,  
220 exhibited significantly smaller centroid sizes than LS1 and Controls (Tukey's post-hoc test,  
221 LS1vsLS2  $p < 0.001$ , LS1vsCTL  $p = 0.764$ , LS2vsCTL  $p < 0.001$ ) (Supplementary Figure S5;

222 Supplementary Table S4). Thus, we performed our neonate analyses with Procrustes shape  
223 variables and univariate measurements, such as tibia length, adjusted for litter size effects.  
224 Group differences in adult and neonate cranial morphology were evaluated using principal  
225 component analyses (PCA). We assessed whether group mean shapes, independent of size and/or  
226 sex, were statistically significantly different using a randomized residual (1000 permutations)  
227 Procrustes ANCOVA (Goodall, 1991; Collyer, Sekora and Adams, 2015). Post-hoc pairwise  
228 tests compared differences in least-squares means between groups (Collyer and Adams, 2018).  
229 For visualizations of cranial shape differences between lines, we used deformation heatmaps and  
230 cranial meshes with vectors of shape change that depict transformations between group means.  
231 All GM analyses were performed in R with the *geomorph*, *Morpho*, and *RRPP* packages  
232 (Schlager, 2017, 2020; Collyer and Adams, 2018; Adams, Collyer and Kaliontzopoulou, 2020).  
233

## 234 **Results**

### 235 **Longshanks Adults**

#### 236 *Body mass and cranium size allometry is altered in Longshanks adults*

237 F01 mice (founders) that had not been subjected to selection did not differ in average weight or  
238 tibia length between lines (Supplementary Figure S6; Supplementary Table S5). Moreover,  
239 random-bred F09 Controls and F20 Controls did not differ from F01 founders in terms of tibia  
240 length (Supplementary Figure S6; Supplementary Table S5). In contrast, LS1 and LS2 at F09  
241 have an average of 7.3% longer tibiae compared to F09 Controls, while LS1 and LS2 at F20  
242 have 16.4% longer tibiae on average when compared to F20 Controls (Supplementary Figure S6;  
243 Supplementary Table S5). Average body mass in our sample was stable between lines across all  
244 three generations and did not differ significantly in all but two pairwise comparisons between  
245 groups (Supplementary Figure S6; Supplementary Table S5). In contrast, at generation F20, LS1  
246 and LS2 mice had significantly larger cranium centroid sizes than Controls (Tukey's post-hoc  
247 test, F20 LS1vsF20 CTL  $p < 0.05$ , F20 LS2vsF20 CTL  $p < 0.05$ ), though the latter did not differ  
248 from F01 or F09 Controls (Tukey's post-hoc test, F01 CTLvsF09 CTL  $p = 0.566$ , F09  
249 CTLvsF20 CTL  $p = 0.276$ , F01 CTLvsF20 CTL  $p = 0.999$ ).

250 Given that the long bones of the Longshanks post-cranial skeleton are larger than Controls at any  
251 given body mass (Sparrow *et al.* 2017), we asked if the allometric scaling relationship between  
252 Longshanks crania and overall body mass had changed in response to 20 generations of  
253 selection. ANCOVA comparing mean cranium centroid size among lines using body mass as the  
254 covariate indicates that body mass is significantly correlated with cranium centroid size ( $r =$   
255  $0.697$ ,  $p < 0.001$ ). There was a significant difference in centroid size between Controls and

256 Longshanks after controlling for covariation with body mass, however LS1 and LS2 did not  
257 differ from each other (Tukey's post-hoc test, LS1vsLS2  $p = 0.460$ , LS1vsCTL  $p < 0.001$ , LS2-  
258 CTL  $p < 0.001$ ). Hence, Longshanks selected lines have skeletally larger crania after 20  
259 generations of selection independent of body mass (Supplementary Figure S4).

260 *The Longshanks cranium is longer, narrower, and flatter*

261 Next, we asked if the fact that tibia length and cranium centroid size increases in F20 LS1 and  
262 LS2 is associated with shape differences in their cranium compared to F09 and F01 mice. We  
263 performed a principal component analysis (PCA) on the residuals of a multivariate regression of  
264 shape on sex in order to control for potential sex effects on cranial shape in our sample.

265 Comparison of PC score means between groups demonstrates that despite overlap in skull shape,  
266 LS1 and LS2 have shifted substantially into positive PC1 space, reflecting crania that are longer  
267 and narrower with reduction in vault height (Figure 1A). Post-hoc pairwise comparisons from a  
268 Procrustes ANCOVA comparing adult cranium shape by group, independent of sex effects,  
269 showed that all groups within line by generation, or within generation by line, differ in mean  
270 shape, except F01 LS2 and Controls (F01 LS2 vs F01 CTL  $p = 0.203$ ). When comparing the  
271 Euclidean distance among group sex-adjusted PC score means, however, F20 LS1 and LS2 mice  
272 are on average over twice as far from unselected mice in morphospace (i.e., all F01 founders,  
273 F09 and F20 controls) than the latter are from each other (mean Euclidean distances 0.023 vs  
274 0.010, Supplementary Table S6)

275

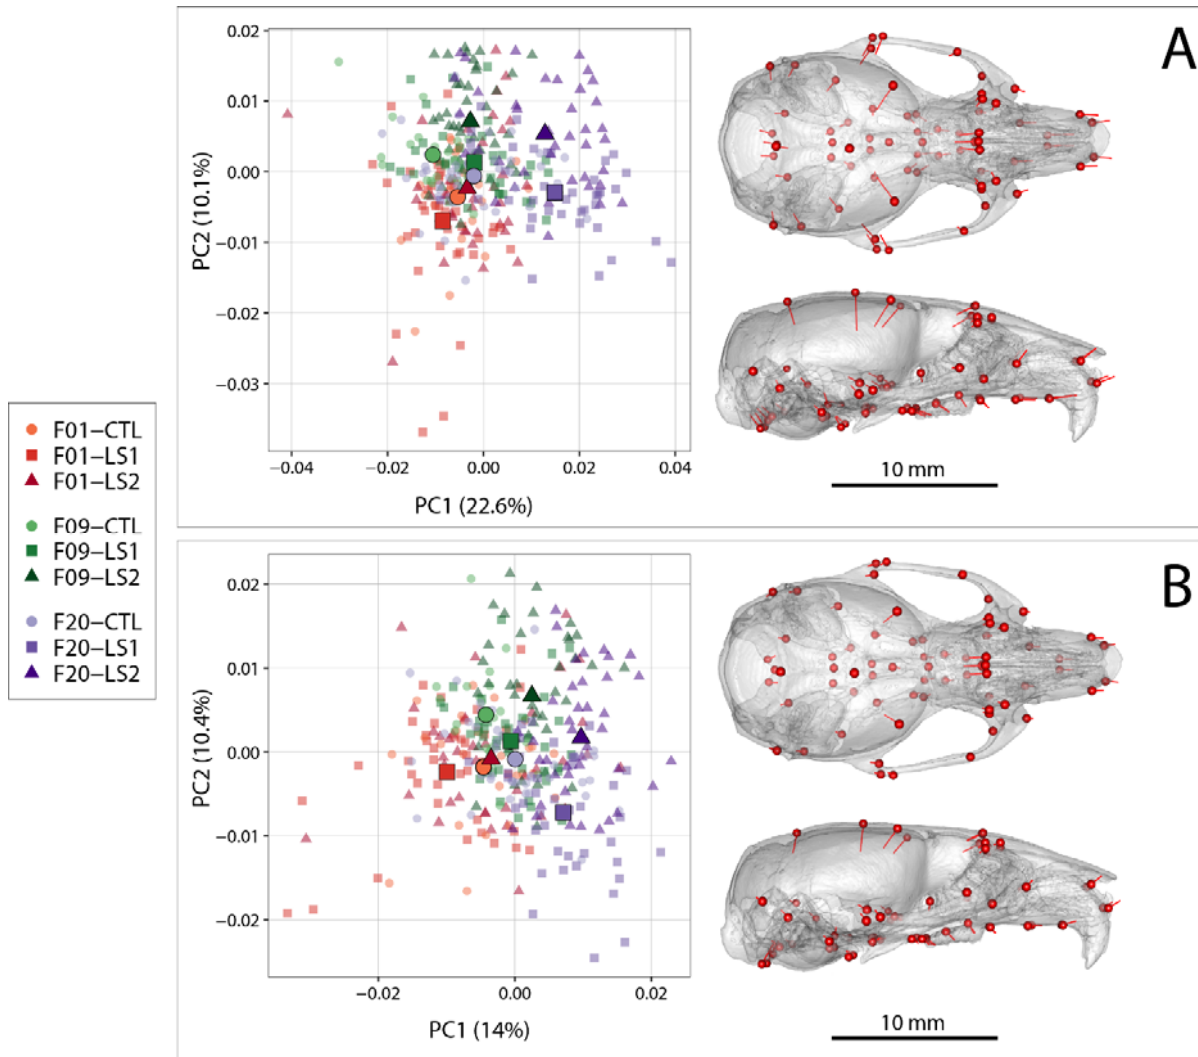

**Figure 1** – Scatter plots of the first two principal components (PC) of Procrustes shape variables in adult Longshanks and Controls throughout the selection process. (A) Plot of sex-adjusted Procrustes shape variables (left), and vectors of shape change at each cranium landmark (magnified 2 times for visualization) showing shape transformations along PC1 from negative to positive scores (right). Large symbols indicate mean PC1 and PC2 scores for each respective cohort. (B) Plot of Procrustes shape variables additionally corrected for size.

276

277

278

279 *Longshanks cranial shape differences remain after controlling for skull size and sex*

280 Given that PC1 generally captures differences in shape primarily due to allometric effects of size  
281 (Klingenberg, 2016), and that LS1 and LS2 have larger skulls in F20, we asked if the cranium of  
282 F20 selected lines score more positively simply because they are larger, and if larger skulls are  
283 associated with different cranium shapes in F20 selected lines compared to Controls and F01  
284 unselected lines. We compared the fitted PC1 scores of a pooled-within group regression of  
285 shape on size to log (centroid size), which shows the cranium size and shape scaling relationship,  
286 between all nine groups in our sample (Supplementary Figure S7). At any given centroid size,  
287 Longshanks F20 selected lines score more positively (longer and narrower) in predicted shape.  
288 Importantly, the slopes of the lines, which capture the scaling relationship between cranium  
289 shape and size did not differ significantly between any of the groups in our sample ( $p > 0.05$ ).  
290 Thus, while Longshanks F20 LS1 and LS2 have larger crania at any given body mass compared  
291 to Controls, the allometric pattern within the cranium itself was not altered by selection for  
292 increased tibia length.

293 The difference in intercept between the fitted PC1 scores and log centroid size of LS1 and LS2 in  
294 relation to Controls (Supplementary Figure S7) suggest that while the increase in size of F20  
295 selected crania contributes to the shape differences along PC1, it is not the only cause of shape  
296 variation. We therefore asked if differences in shape between the Longshanks and Control  
297 cohorts persist when the effect of size is removed from our sample by using multivariate  
298 regression residuals of shape on size. The PCA of shape independent of size and sex shows a  
299 marked reduction in group separation along PC1; however, F20 LS1 and LS2 still typically score  
300 more positively in PC1, corresponding to crania that are relatively longer, narrower, and have  
301 reduction in vault height (Figure 1B). Post-hoc pairwise comparisons from a Procrustes

302 ANCOVA comparing adult cranium shape by group independent of size and sex effects showed  
303 that all groups within line by generation, or within generation by line, differ in mean shape ( $F =$   
304  $8.205$ ,  $p < 0.001$ ) except F01 LS2 and Controls (F01 LS2 – F01 CTL  $p = 0.173$ ). As with sex-  
305 adjusted data, F20 Longshanks mice are substantially farther in morphospace from unselected  
306 groups than the latter are from each other (mean Euclidean distances  $0.017$  vs  $0.010$ ,  
307 Supplementary Table S6)

308 *Intergenerational changes occurred in a stepwise process*

309 F09 LS1 and LS2 score more positively along PC1 in the same direction as F20 LS1 and LS2  
310 after removing size effects (Figures 1B, 2). In other words, F09 LS1 and LS2 appear to have  
311 intermediate shapes along PC1 between F01 groups and F20 selected lines (Figure 2). This led us  
312 to ask how intergenerational changes in cranium shape occurred throughout the selection  
313 process. We computed the mean shapes of LS1 and LS2 lines over time and compared them  
314 using deformation heat maps to track shape change between generations within a selection line.  
315 Our results show that indirect responses to selection in the Longshanks cranium occurred in a  
316 stepwise process: shape change in the first nine generations of selection contributed to the  
317 reduction in vault height, whereas the remaining 11 generations of tibia selection led to a  
318 reduction in cranial width at the zygomatic arches in parallel with snout elongation (arrows in  
319 Figure 2). In comparison, intergenerational changes in the Control lines shows virtually no  
320 change in cranial vault height between F01 and F09, and a reduction in the occipital area of the  
321 cranium from F09 to F20 (Figure 2).

322



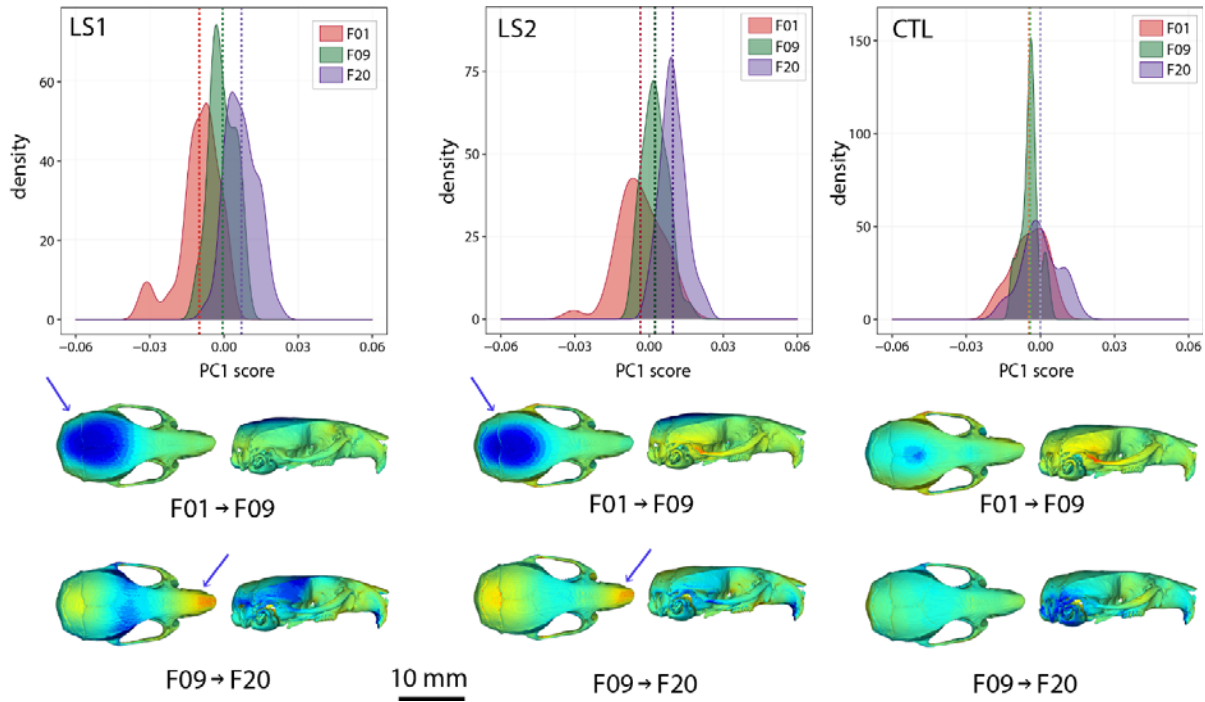

**Figure 2** - Intergenerational shape changes within both Longshanks lines and Controls throughout the selection process. Top: Density plots following intergenerational shifts in mean PC1 scores within LS1 (left), LS2 (center), and CTL (right) lines for size and sex adjusted shape data. Bottom: Heatmaps showing shape transformations between mean shapes in the first 9 generations of selection (F01 to F09) and the next 11 generations (F09 to F20) after correcting for size and sex effects. Blue indicates areas of relative reduction, red indicates areas of relative expansion, and green indicates neutral areas. Longshanks

323

324

325 **Longshanks P07 Neonates**

326 *Neonate crania have similar shape patterns as Longshanks adults*

327 We investigated if we could detect the adult pattern in shape differences earlier in ontogeny.  
328 Using one-week old (P07) Longshanks neonates, we compared cranial shape at a time when the  
329 Longshanks tibia is growing most rapidly and tibia length differences are already observable  
330 (Farooq *et al.*, 2017; Marchini and Rolian, 2018) (Supplementary Figure S5, Supplementary  
331 Table S4). After regressing out litter size effects, our PCA of neonate cranial shape showed a  
332 large separation in morphospace between the selected lines and Controls (Figure 3). LS1 and  
333 LS2 cluster more closely than Controls and have skulls that are longer, narrower and have  
334 reduced vault heights (Figures 3, 4). The Procrustes ANCOVA and pairwise comparisons  
335 showed that LS1, LS2 and Control neonates significantly differ from each other in cranium  
336 shape. In addition, we observed via deformation heatmaps that the cranial pattern seen in  
337 Longshanks adults exists by one-week post partum and becomes more marked with age (Figure  
338 4). The LS2 selection replicate appears to have reduced magnitudes of cranial response  
339 compared to LS1 at F20 and in neonates (Figures 1B, 2, 4).

340

341 *Longshanks neonate cranial bases are flatter than Controls and differ in synchondrosis shape*

342 Given the underlying developmental relationship between the cranial base and the long bones,  
343 we asked if the neonate cranial bases differed in shape along the sagittal plane between  
344 Longshanks and Controls, where the synchondroses' primary axis of elongation exists. We  
345 performed a 2D morphometric analysis and found that groups differed in cranial base shape after  
346 removing litter size effects ( $F = 20.972$ ,  $p < 0.001$ ). As with the neonate cranial form, Procrustes

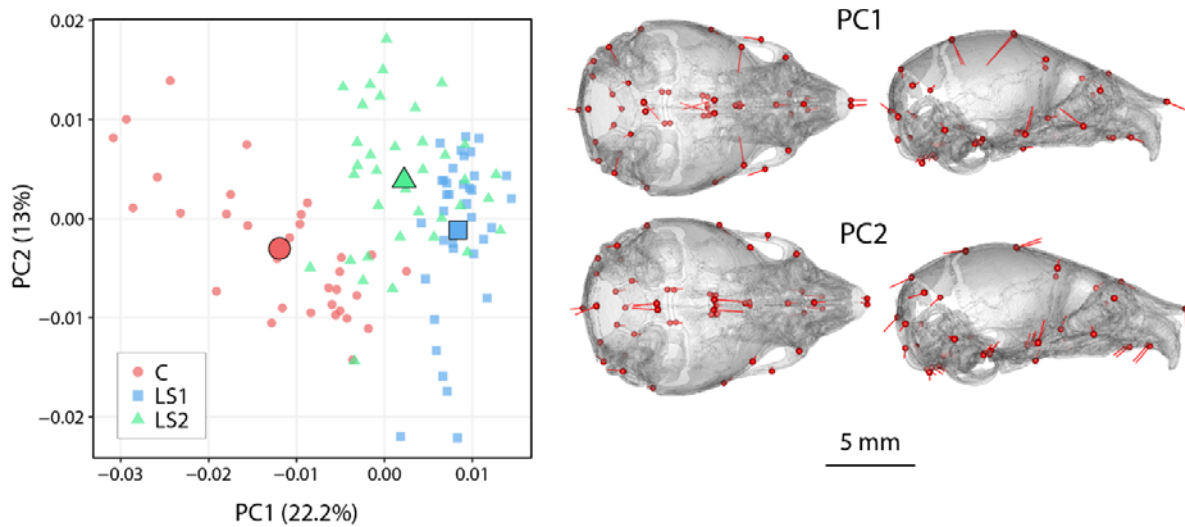

**Figure 3** - Scatter plots of the first principal components (PC) in neonate Longshanks and Control cranium Procrustes shape variables at generation 32 (F32). Left: Plot of litter size adjusted Procrustes shape variables (left), large symbols indicate mean PC1 and PC2 scores for each respective cohort. Shapes of individual points indicate Longshanks lines (circle = CTL, square = LS1, and triangle = LS2). Right: Neonate cranium with vectors of shape change at each cranium landmark (magnified 4 times for visualization) showing shape transformations along PC1 (top) and along PC2 (bottom) from negative to positive scores.

347 ANCOVA and pairwise comparisons of cranial base shape showed that LS1, LS2 and Control  
348 neonate mean cranial shapes all differ from each other. Longshanks neonate cranial base shapes  
349 differed from Controls in a similar pattern, but to different extents, with LS2 assuming an  
350 intermediate position in cranial base morphospace (Figure 5A). Deformations comparing a mean  
351 Control cranial base to LS1 and LS2 means show a flattening of the cranial base in both  
352 Longshanks lines (Figure 5B). Moreover, the shape of the ISS changes in LS1 and LS2  
353 compared to Controls, expanding dorsally to become more wedge-shaped, whereas the SOS  
354 shows no significant shape change differentiating them from the Control SOS shape (Figure 5B).  
355 This suggests that a cellular change in the dorsal aspect of the ISS could be driving cranial base

356 flattening in the Longshanks juvenile skull, and hence potentially into adulthood given the  
357 broadly similar shape changes observed at both stages.

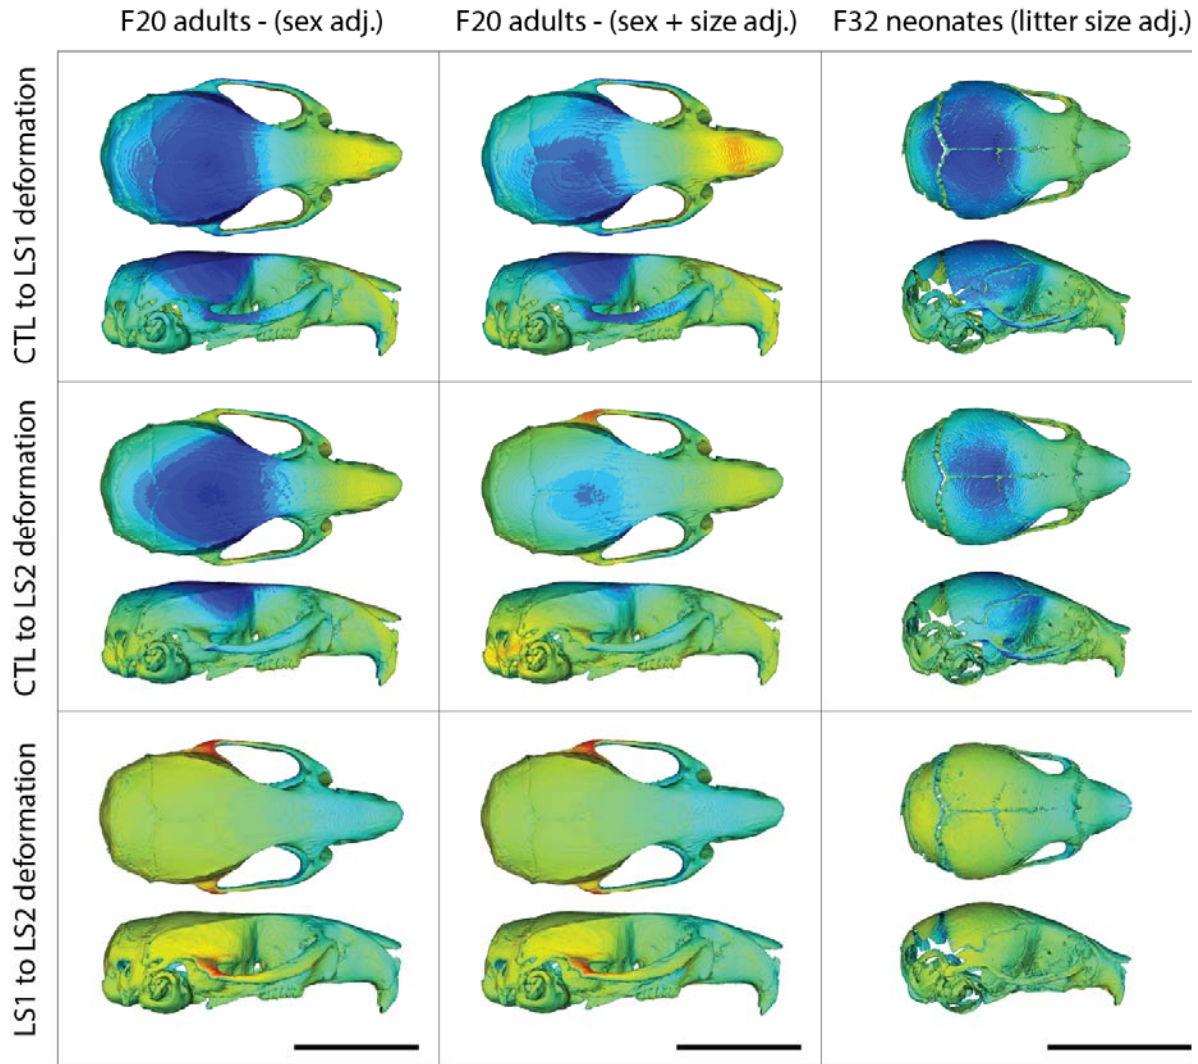

**Figure 4** – Comparison of adult and neonate cranial phenotypes through shape change heatmaps. Heatmaps show the deformations required to transform between the mean shape of a given cohort to the mean shape of another. Blue indicates areas of relative reduction, red indicates areas of relative expansion, and green indicates neutral areas. Scale bar = 10 mm.

358 To qualitatively validate the cellular changes inferred from our 2D GM analysis, we collected  
359 and imaged cranial base sections near the sagittal midline. Since these developmental shape  
360 differences are still subtle, we selected two representative extreme specimens that had large  
361 differences in ossified tibia length, cranial base shape and cranium shape, yet comparable  
362 cranium centroid sizes so that size would not confound our analysis. In agreement with our  
363 morphometric data, the SOS does not differ qualitatively between these extreme specimens  
364 (Figure 5C). However, the ISS is markedly larger in our Longshanks specimen compared to the  
365 Control, with larger resting and proliferative zones that recapitulate the cellular differences  
366 characterized in the Longshanks epiphysis (Figure 5C) (Marchini and Rolian, 2018). Crucially,  
367 the ISS is more wedge-shaped in our Longshanks specimen at the cellular level, supporting the  
368 observed ISS changes at the morphometric level (Figure 5B, C).

369

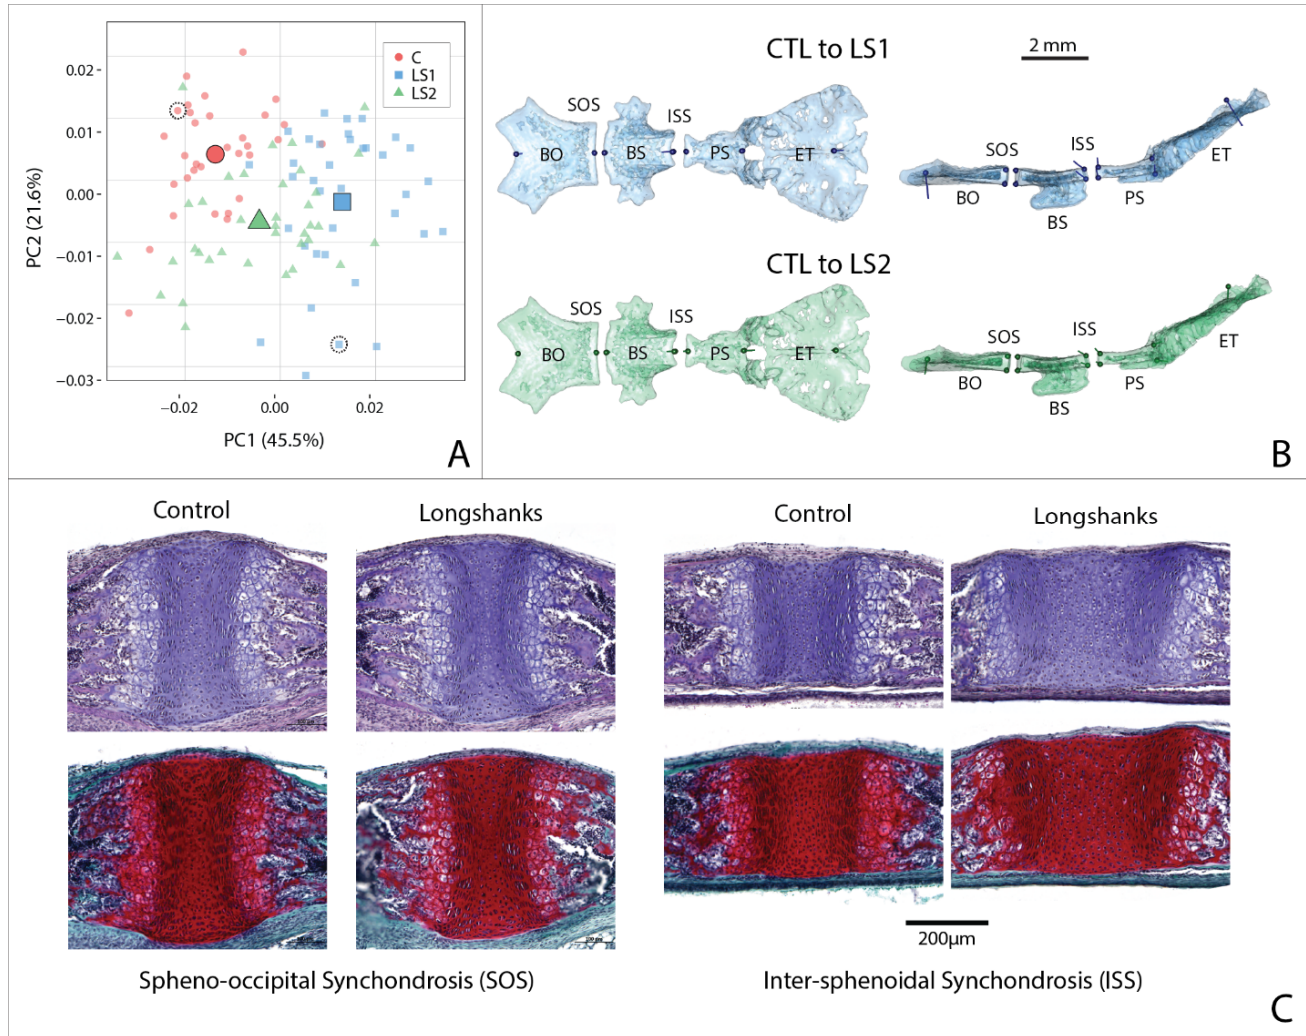

**Figure 5** - Cranial base contribution to the Longshanks phenotype. (A) Scatter plot of the first two PCs of litter size-adjusted Longshanks and Control cranial base Procrustes shape variables in generation 32 (F32) neonates. Large symbols indicate mean PC1 and PC2 scores for each respective cohort. (B) Neonate cranial bases with vectors of shape change at midline cranial base landmarks (magnified 6 times for visualization) showing shape transformations to go from the mean Control cranial base to the mean LS1 (blue) and mean LS2 (green) cranial base shapes. Views in (B) are dorsal (left) and lateral (right). Abbreviations: basi-occipital bone (BO), spheno-occipital synchondrosis (SOS), basi-sphenoid bone (BS), intersphenoidal synchondrosis (ISS), presphenoid bone (PS) and ethmoid (ET). (C) Sagittal midline histological sections stained in H+E (top) and safranin-o (bottom) showing differences in synchondrosis morphology of two extreme specimens in CTL and LS1 of approximately equal centroid size (indicated by dashed circles in A).

## 371 **Discussion**

372 We investigated correlated evolution between the limb and cranium in the selectively bred  
373 Longshanks mouse. Our morphometric analysis of adult cranium shape demonstrated that 20  
374 generations of selection for longer tibiae relative to body mass are associated with the elongation  
375 of the cranium along the rostral caudal axis in Longshanks mice, independent of an overall  
376 increase in cranial size (Figure 1). In parallel, the cranium of Longshanks decreased in width  
377 between the zygomatic arches and reduced in vault height at the bregma and lambda (Figure 1).  
378 LS2 mice appear to have a more subtle phenotype than LS1 in adulthood and at P07 (Figures 1,  
379 2, 4, 6A). This is not unexpected, as other genomic and phenotypic differences in the response to  
380 selection between LS1 and LS2 have been documented previously (Farooq *et al.*, 2017; Castro *et*  
381 *al.*, 2019; Cosman, Britz and Rolian, 2019).

382 The magnitudes of cranial shape change remain small in Longshanks relative to Controls, in  
383 comparison to stark morphological differences seen in skeletal mouse mutants (Munroe *et al.*,  
384 2009; Gong, 2012; Holmes, 2012). However, in this study, we are more interested in patterns of  
385 shape change rather than magnitudes of change. Over 20 generations, the main target of  
386 selection, the tibia, increased in length by just 15%. As such, it is expected that secondary cranial  
387 shape changes, while potentially significant in terms of long-term evolution, will be quite subtle.  
388 Moreover, selection in the tibia appears to have increased the variation in cranium measures,  
389 such as centroid size and cranial shape (Figures 2, S6). While the F20 LS1 and LS2 samples  
390 have new extreme cranium shapes not seen in earlier generations, their effects on the mean shape  
391 are dampened substantially by the fact that many F20 mice still have crania that resemble F01  
392 unselected mice.

393 The net cranium phenotypic change manifested as a stepwise series of two evolutionary shape  
394 changes rather than changes that occurred in concert. The cranium of both selected lines  
395 consistently reduced in vault height in the first nine generations of tibia selection and then  
396 elongated and narrowed in the next eleven generations of selection (Figure 2). In comparison, the  
397 Control line shows cranial shape changes around the zygomatic and occipital regions, which are  
398 presumably due to stochastic intergenerational variation in the Control line (i.e., drift), and/or to  
399 sampling artifacts, such as low sample size and family diversity in F09 Controls (Table 1).  
400 Stepwise mechanisms of evolutionary change have also been described in natural populations.  
401 Parmenter and colleagues noted that Gough Island mice, which differ significantly in body size  
402 compared to mainland relatives, have crania that are longer and narrower, without differences in  
403 vault height (Parmenter *et al.*, 2016). These shape differences coincide with the intergenerational  
404 changes described in the F09 to F20 Longshanks shape trajectory, highlighting the power of  
405 selection experiments to uncover the tempo and mode of evolutionary change across multiple  
406 traits.

407 The two sets of shape changes may reflect the way selection targeted sources of variation in  
408 Longshanks. Strong selection pressure may have targeted processes that drive the generation of  
409 local tibia length variation which are also correlated to the cranial base development via  
410 pleiotropy. In a recent paper investigating the underlying genomics of Longshanks, we  
411 highlighted an allelic variant that reduces expression of NKX-3.2, a bone growth repressor, that  
412 was brought to near-fixation by generation 17 in both Longshanks lines in parallel (Castro *et al.*,  
413 2019). Interestingly, complete ablation of *nkx-3.2* (also known as *bagpipe-1*) results in cranial  
414 base truncation and premature synchondrosis fusion in mice (Lettice *et al.*, 1999). Thus, it is



415 possible that selection for increased tibia growth via *nkx-3.2* downregulation caused indirect  
416 cranial changes through the pleiotropic effects of *nkx-3.2*.

417 The second set of cranium shape changes may reflect a shift to selection targeting processes that  
418 generate systemic skeletal size variation following depletion or reduction of local allelic  
419 variation contributing to tibia length. Several factors could cause a systemic increase in growth  
420 of the Longshanks skeleton, such as altered expression of factors that modulate the IHH-PTHrP  
421 axis systemically in all growth plates or a bone tissue specific increase to the sensitivity to  
422 endocrine factors. A shift in the target of selection from genes of local effect to systemic effects  
423 could explain the skeletal increases in the entire post-cranium of Longshanks mice and would  
424 agree with our present findings that the allometric scaling of cranium size to body mass has been  
425 altered in Longshanks (Sparrow *et al.*, 2017).

426 Our investigation of Longshanks neonate ontogeny revealed that the adult cranium pattern is  
427 already present by one-week post partum (Figure 4). Analyses of cranial base shape in P07  
428 neonates reveals that the cranial base is flatter in Longshanks mice at this time (Figure 5).

429 Moreover, 2D morphometrics at the midline and histology demonstrated that Longshanks  
430 neonates have a larger ISS with larger resting and proliferative zones, especially in its dorsal  
431 aspect (Figure 5B, C), much like differences characterized in the tibial proximal epiphysis of  
432 Longshanks (Marchini and Rolian, 2018). These results suggest that the ISS responded to  
433 selection on the tibia independently of the SOS and may be responsible in part for the  
434 Longshanks cranial phenotype. We note, however, that our ontogenetic analysis captures only  
435 one developmental stage and that the apparent uncoupling of the synchondroses may be because  
436 the SOS has developmentally important differences in Longshanks at a different time in  
437 development (Wealthall and Herring, 2006).

438 Differential timing of SOS and ISS fusion are widespread across clades, suggesting these growth  
439 centers are partly under independent genetic and developmental control. For example, in  
440 humans, the ISS begins fusing at birth, whereas the SOS does not fuse until adolescence  
441 (Madeline and Elster, 1995). In domestic dogs, premature fusion of the SOS is a prominent  
442 feature of brachycephalic dogs (Schmidt *et al.*, 2013). Moreover, knock-out studies of  
443 skeletogenic factors in rodents have noted concerted changes in the postcranial epiphyses and  
444 synchondroses, but both synchondroses do not always respond to these perturbations in similar  
445 manners (reviewed in (Vora, 2017)). For example, in mice, Indian hedgehog (*Ihh*<sup>-/-</sup>) knockout  
446 results in significantly more ectopic hypertrophic chondrocytes in the ISS than in the SOS  
447 (Young *et al.*, 2006).

448 Intrinsic genetic regulatory differences may stem from the fact that the two synchondroses have  
449 distinct embryonic origins. The pre-sphenoid and basi-sphenoid bones originate from neural crest  
450 cells that commit to endochondral ossification, whereas the basi-occipital bone forms from  
451 mesenchymal condensations of prechordal mesoderm (McBratney-Owen *et al.*, 2008;  
452 Richtsmeier and Flaherty, 2013). The SOS and ISS also develop in proximity of different tissues  
453 with potentially different signalling influences, for example, the future SOS grows directly below  
454 the developing pituitary gland (McBratney-Owen *et al.*, 2008). The respective synchondroses  
455 have different mineralization patterns in both C57BL/6J and CD-1 mice that are likely indicative  
456 of independent regulation resulting from differences in embryonic tissue origin (Wealthall and  
457 Herring, 2006; Vora, Camci and Cox, 2016). These developmental differences may account for  
458 some of the differences observed between Longshanks and Control.

459 Extensive work has gone into understanding integration and epigenetic interactions within the  
460 mammalian cranium (DE, CF and MJ, 2000; Bookstein *et al.*, 2003; Goswami, 2006; Goswami

461 *et al.*, 2012; Singh *et al.*, 2012; Bastir and Rosas, 2016; Neaux, 2016; Neaux *et al.*, 2019).

462 Previous studies have divided the skull into three independently variable regions (i.e. modules),  
463 the basicranium, calvarium and the viscerocranium, which differ in embryonic origin and interact  
464 at the physical and molecular level to form an integrated complex (Cheverud, 1982, 1996;  
465 Goswami, 2006; Martínez-Abadías *et al.*, 2009; Parsons *et al.*, 2011). For example, direct  
466 basicranium perturbations by genetic mutation resulting in overgrowth and undergrowth of the  
467 basicranium generated predictable shape changes (Parsons *et al.*, 2015). Undergrowth models  
468 resulted in shortened faces and tall, domed calvaria whereas overgrowth models, such as the Pten  
469 <sup>-/-</sup> mouse, resulted in flattened calvaria, elongated faces and reduced cranial width (Ford-  
470 Hutchinson *et al.*, 2007; Parsons *et al.*, 2015). Moreover, analysis of mutant mouse models  
471 affecting brain size and cranial base length demonstrated that the angle of the cranial base is  
472 related to brain size, cranial base length and face size (Ross and Ravosa, 1993; Lieberman *et al.*,  
473 2008).

474 Combining our findings with these studies, we propose a model that relates neonate ontogeny to  
475 the adult Longshanks cranium phenotype (Figure 6). We propose that underlying genetic and  
476 developmental integration between the developing limb and synchondroses results in correlated  
477 cellular changes to the epiphyseal growth plate in the tibia and the ISS in developing Longshanks  
478 mice. The enlargement of the ISS would then drive mechanical interaction between the  
479 developing basicranial bones that results in a relative flattening of the cranial base and extension  
480 of the angle formed between the basicranium and the slope of the ethmoid (Figure 6A). This  
481 flattening would result in a commensurate increase in endocranial volume. We do not yet know  
482 how the brain volume of Longshanks mice compares to Controls; however, the observed

483 reduction in vault height and mediolateral width may compensate for cranial base shape changes  
484 such that endocranial volume remains constant (Figure 6C).

485 Lastly, we hypothesize that extension of the cranial base exerts an epigenetic pressure on the  
486 developing face that results in snout elongation (Figure 6B). This could be due to mechanical  
487 pressure placed on the nasal septum. The interaction between the cranial base and nasal septum,  
488 which form a continuous structure running the length of the skull, becomes prominent in post-  
489 partum growth (Wealthall and Herring, 2006). Here, expansion of the septo-ethmoidal and septo-  
490 presphenoidal junctions contributes to the out-growth of the murine face (Wealthall and Herring,  
491 2006). The nasal septum is physically linked to the maxilla and rostral tip of the nasal bones by  
492 ligaments, and resection of these ligaments leads to reduced facial growth and decreased  
493 nasofrontal suture expansion in rats and mice, respectively (Latham, 1970; Gange and Johnston,  
494 1974; Siegel *et al.*, 1985). Thus, it is possible that the enlarged ISS confers a mechanical pressure  
495 onto the nasal septum via the septo-presphenoidal and septo-ethmoidal junctions, which then

4

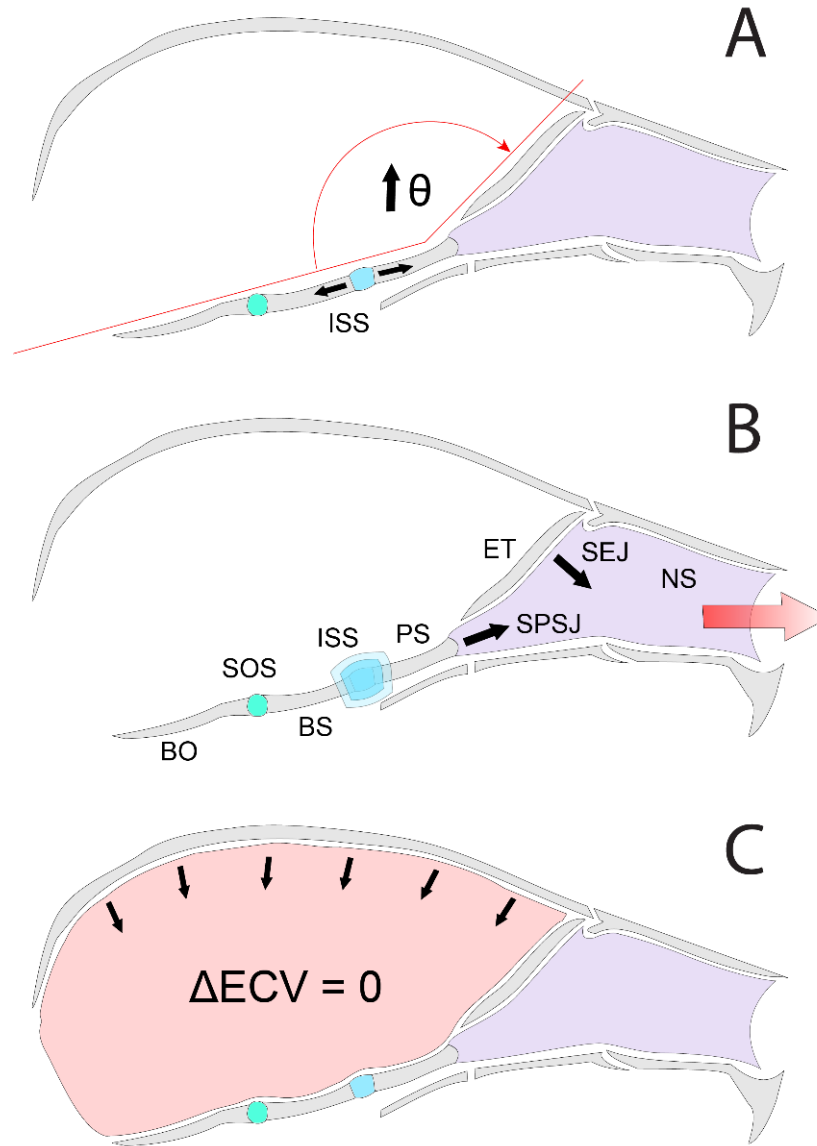

**Figure 6** – Model relating the Longshanks neonate phenotypes to the adult cranial form. (A) Intersphenoidal synchondrosis (blue) expansion drives cranial base flattening (extension of theta). The sphenoccipital synchondrosis remains unchanged (green). (B) Intersphenoidal synchondrosis expansion places mechanical pressure (black arrows) on the nasal septum (purple) that enhances facial outgrowth (red arrow). (C) Vault height reduces (black arrows) to compensate for the effect of cranial base flattening on endocranial volume (red). Endocranial volume (ECV), basioccipital bone (BO), sphenoccipital synchondrosis (SOS), basi-sphenoid bone (BS), intersphenoidal synchondrosis (ISS), presphenoid bone (PS), ethmoid (ET), nasal septum (NS), septo-ethmoidal junction (SEJ) and septo-presphenoidal junction (SPSJ).

497 the surrounding facial bones. In line with this idea, mice lacking an ethmoid via *Foxl2* ablation  
498 have reduced face size with small maxillary, premaxillary, and nasal bones (Marongiu *et al.*,  
499 2015).

500 In this study, we characterized secondary skeletal responses to tibia selection that likely arose  
501 due to shared underlying genetic and developmental mechanisms between the cranium and tibia,  
502 specifically endochondral ossification. The limb and cranium are often considered separate  
503 modules in morphological analyses (Young and Hallgrímsson, 2005). Our results highlight the  
504 importance of considering evolution of the skeleton as a whole. Our study shows how indirect,  
505 and potentially non-adaptive, skeletal changes can occur due to genetic and/or developmental  
506 overlap among physically and functionally distant body parts. These findings have implications  
507 for how we reconstruct skeletal evolutionary histories of extant and extinct mammalian lineages  
508 by providing empirical evidence of the existence of skeletal traits that arise solely as side effects  
509 of selection acting elsewhere.

510

## 511 **Limitations and Future Directions**

512 We propose that changes to cranial form occurred as non-adaptive, secondary effects from  
513 selection for increased tibia length. We cannot say with certainty, however, that there were no  
514 selective pressures acting on the cranium. If selected Longshanks breeders consistently had  
515 larger craniums at all times during the experiment, then we cannot rule out the possibility that  
516 cranium form, which was not quantified when selecting breeders, had an effect on their fitness,  
517 which would make cranial shape change adaptive. We note, however, that the phenotypic  
518 correlation between cranial shape and tibia length within generations is weak, suggesting that

519 selecting for longer tibiae did not necessarily mean selecting for altered cranial shape/size in this  
520 experiment (Figure S8), and that any correlated response in cranial shape is thus more likely due  
521 to underlying genetic correlations. Future works will seek to investigate cranial base shape and  
522 synchondrosis cellular architecture at other timepoints in ontogeny, e.g., reaching as far back as  
523 E11-E16 when the chondrocranium forms in utero (McBratney-Owen *et al.*, 2008). Quantitative  
524 histomorphometry of the synchondroses will also be necessary to verify our qualitative  
525 assessment of the size of the respective chondrocyte zones observed in our sample of phenotypic  
526 extremes.

527

## 528 **Acknowledgments**

529 The authors are grateful to the Animal Resource Center staff at the University of Calgary for the  
530 continued care they provide to the Longshanks colonies. The authors are also indebted to Jason  
531 Anderson and Jessica Theodor for granting access to the SkyScan 1173 uCT scanner for data  
532 acquisition. The authors are also grateful to Dragana Ponjevic for expertise in histology and  
533 Heather Jamniczky for guidance in data analysis. This work was supported by a Natural Sciences  
534 and Engineering Research Council Canada Graduate Scholarships – Master’s award to CMU, a  
535 Natural Sciences and Engineering Research Council Discovery Grant 4181932 to CR, and the  
536 Faculty of Veterinary Medicine at the University of Calgary ([www.vet.ucalgary.ca](http://www.vet.ucalgary.ca)).

537

## 538 **Competing Interests**

539 The authors declare no conflict of interest.

540 **References**

541 Adams, D., Collyer, M. and Kaliontzopoulou, A. (2020) ‘Geomorph: Software for geometric  
542 morphometric analyses. R package version 3.2.1.’ Available at: [https://cran.r-](https://cran.r-project.org/package=geomorph)  
543 [project.org/package=geomorph](https://cran.r-project.org/package=geomorph).

544 Armbruster, W. S. and Schwaegerle, K. E. (1996) ‘Causes of covariation of phenotypic traits  
545 among populations’, *Journal of Evolutionary Biology*, 9(3), pp. 261–276. doi: 10.1046/j.1420-  
546 9101.1996.9030261.x.

547 Avants, B. B. *et al.* (2011) ‘A reproducible evaluation of ANTs similarity metric performance in  
548 brain image registration’, *NeuroImage*, 54(3), pp. 2033–2044. doi:  
549 10.1016/j.neuroimage.2010.09.025.

550 Bastir, M. and Rosas, A. (2006) ‘Correlated variation between the lateral basicranium and the  
551 face: A geometric morphometric study in different human groups’, *Archives of Oral Biology*,  
552 51(9), pp. 814–824. doi: 10.1016/j.archoralbio.2006.03.009.

553 Bastir, M. and Rosas, A. (2016) ‘Cranial base topology and basic trends in the facial evolution of  
554 Homo’, *Journal of Human Evolution*, 91, pp. 26–35. doi: 10.1016/j.jhevol.2015.11.001.

555 De Beer, G. (1937) *The development of the vertebrate skull*. Oxford: The Clarendon Press.

556 Bookstein, F. L. *et al.* (2003) ‘Cranial integration in Homo: Singular warps analysis of the  
557 midsagittal plane in ontogeny and evolution’, *Journal of Human Evolution*, 44(2), pp. 167–  
558 187. doi: 10.1016/S0047-2484(02)00201-4.

559 Castro, J. P. *et al.* (2019) ‘An integrative genomic analysis of the Longshanks selection  
560 experiment for longer limbs in mice’, *eLife*, 8. doi: 10.7554/elife.42014.



- 561 Cheverud, J. M. (1982) ‘Relationships among ontogenetic, static, and evolutionary allometry’,  
562 *American Journal of Physical Anthropology*, 59(2), pp. 139–149. doi:  
563 10.1002/ajpa.1330590204.
- 564 Cheverud, J. M. (1996) ‘Developmental integration and the evolution of pleiotropy’, *American*  
565 *Zoologist*, 36(1), pp. 44–50. doi: 10.1093/icb/36.1.44.
- 566 Collyer, M. L. and Adams, D. C. (2018) ‘RRPP: An R package for fitting linear models to high-  
567 dimensional data using residual randomization’, *Methods in Ecology and Evolution*. Edited by  
568 R. Freckleton, 9(7), pp. 1772–1779. doi: 10.1111/2041-210X.13029.
- 569 Collyer, M. L., Sekora, D. J. and Adams, D. C. (2015) ‘A method for analysis of phenotypic  
570 change for phenotypes described by high-dimensional data’, *Heredity*, 115(4), pp. 357–365.  
571 doi: 10.1038/hdy.2014.75.
- 572 Cosman, M. N., Britz, H. M. and Rolian, C. (2019) ‘Selection for longer limbs in mice increases  
573 bone stiffness and brittleness, but does not alter bending strength’, *Journal of Experimental*  
574 *Biology*, 222(9). doi: 10.1242/jeb.203125.
- 575 Cosman, M. N., Sparrow, L. M. and Rolian, C. (2016) ‘Changes in shape and cross-sectional  
576 geometry in the tibia of mice selectively bred for increases in relative bone length’, *Journal of*  
577 *Anatomy*, 228(6), pp. 940–951. doi: 10.1111/joa.12459.
- 578 von Cramon-Taubadel, N. (2019) ‘Multivariate morphometrics, quantitative genetics, and neutral  
579 theory: Developing a “modern synthesis” for primate evolutionary morphology’, *Evolutionary*  
580 *Anthropology: Issues, News, and Reviews*, 28(1), pp. 21–33. doi: 10.1002/evan.21761.
- 581 DE, L., CF, R. and MJ, R. (2000) ‘The primate cranial base: ontogeny, function, and

- 582 integration', *American journal of physical anthropology*, Suppl 31. doi: 10.1002/1096-  
583 8644(2000)43:31+<117::AID-AJPA5>3.3.CO;2-9.
- 584 Devine, J. *et al.* (2020) 'A Registration and Deep Learning Approach to Automated Landmark  
585 Detection for Geometric Morphometrics', *Evolutionary Biology*, 47(3), pp. 246–259. doi:  
586 10.1007/s11692-020-09508-8.
- 587 Farooq, S. *et al.* (2017) 'Cortical and trabecular morphology is altered in the limb bones of mice  
588 artificially selected for faster skeletal growth', *Scientific Reports*, 7(1), pp. 10527–10527. doi:  
589 10.1038/s41598-017-10317-x.
- 590 Ford-Hutchinson, A. F. *et al.* (2007) 'Inactivation of Pten in Osteo-Chondroprogenitor Cells  
591 Leads to Epiphyseal Growth Plate Abnormalities and Skeletal Overgrowth', *Journal of Bone  
592 and Mineral Research*, 22(8), pp. 1245–1259. doi: 10.1359/jbmr.070420.
- 593 Fruciano, C. (2016) 'Measurement error in geometric morphometrics', *Development Genes and  
594 Evolution*. Springer Verlag, pp. 139–158. doi: 10.1007/s00427-016-0537-4.
- 595 Gange, R. J. and Johnston, L. E. (1974) 'The septopremaxillary attachment and midfacial  
596 growth. An experimental study on the albino rat', *American Journal of Orthodontics*, 66(1),  
597 pp. 71–81. doi: 10.1016/0002-9416(74)90194-8.
- 598 Gong, S. G. (2012) 'The Fgfr2 W290R mouse model of Crouzon syndrome', *Child's Nervous  
599 System*, 28(9), pp. 1495–1503. doi: 10.1007/s00381-012-1792-y.
- 600 Goodall, C. (1991) 'Procrustes Methods in the Statistical Analysis of Shape', *Journal of the  
601 Royal Statistical Society: Series B (Methodological)*, 53(2), pp. 285–321. doi: 10.1111/j.2517-  
602 6161.1991.tb01825.x.

- 603 Goswami, A. (2006) ‘Morphological Integration in the Carnivoran Skull’, *Evolution*, 60(1), pp.  
604 169–183. doi: 10.1111/j.0014-3820.2006.tb01091.x.
- 605 Goswami, A. *et al.* (2012) ‘Shape, variance and integration during craniogenesis: contrasting  
606 marsupial and placental mammals’, *Journal of Evolutionary Biology*, 25(5), pp. 862–872. doi:  
607 10.1111/j.1420-9101.2012.02477.x.
- 608 Gould, S. J. and Lewontin, R. C. (1979) ‘The spandrels of San Marco and the Panglossian  
609 paradigm: a critique of the adaptationist programme’, *Proceedings of the Royal Society of  
610 London. Series B. Biological Sciences*, 205(1161), pp. 581–598. doi: 10.1098/rspb.1979.0086.
- 611 Hallgrímsson, B. *et al.* (2009) ‘Deciphering the palimpsest: Studying the relationship between  
612 morphological integration and phenotypic covariation’, *Evolutionary Biology*, 36(4), pp. 355–  
613 376. doi: 10.1007/s11692-009-9076-5.
- 614 Hallgrímsson, B. and Hall, B. K. (2005) ‘Variation and variability: Central concepts in biology’,  
615 in *Variation*. Elsevier Inc., pp. 1–7. doi: 10.1016/B978-012088777-4/50003-X.
- 616 Hallgrímsson, B. and Lieberman, D. E. (2008) ‘Mouse models and the evolutionary  
617 developmental biology of the skull’, *Integrative and Comparative Biology*, 48(3), pp. 373–  
618 384. doi: 10.1093/icb/icn076.
- 619 Hendrikse, J. L., Parsons, T. E. and Hallgrímsson, B. (2007) ‘Evolvability as the proper focus of  
620 evolutionary developmental biology’, *Evolution and Development*, 9(4), pp. 393–401. doi:  
621 10.1111/j.1525-142X.2007.00176.x.
- 622 Holmes, G. (2012) ‘Mouse models of Apert syndrome’, *Child’s Nervous System*, 28(9), pp.  
623 1505–1510. doi: 10.1007/s00381-012-1872-z.

- 624 Karp, N. A. *et al.* (2017) ‘Prevalence of sexual dimorphism in mammalian phenotypic traits’,  
625 *Nature Communications*, 8(1), p. 21. doi: 10.1038/ncomms15475.
- 626 Klingenberg, C. P. (2016) ‘Size, shape, and form: concepts of allometry in geometric  
627 morphometrics’, *Development Genes and Evolution*. Springer Verlag, pp. 113–137. doi:  
628 10.1007/s00427-016-0539-2.
- 629 Kronenberg, H. M. (2003) ‘Developmental regulation of the growth plate’, *Nature*. Nature, pp.  
630 332–336. doi: 10.1038/nature01657.
- 631 Latham, R. A. (1970) ‘Maxillary development and growth: the septo-premaxillary ligament.’,  
632 *Journal of Anatomy*, 107(3), pp. 471–478. Available at:  
633 <https://www.ncbi.nlm.nih.gov/pmc/articles/PMC1233872/> (Accessed: 29 September 2020).
- 634 Lefebvre, V. and Bhattaram, P. (2010) ‘Vertebrate skeletogenesis’, in *Current Topics in*  
635 *Developmental Biology*. Academic Press Inc., pp. 291–317. doi: 10.1016/S0070-  
636 2153(10)90008-2.
- 637 Lerch, J. P., Sled, J. G. and Henkelman, R. M. (2010) ‘MRI phenotyping of genetically altered  
638 mice’, *Methods in Molecular Biology*, 711, pp. 349–361. doi: 10.1007/978-1-61737-992-  
639 5\_17.
- 640 Lettice, L. A. *et al.* (1999) ‘The mouse bagpipe gene controls development of axial skeleton,  
641 skull, and spleen’, *Proceedings of the National Academy of Sciences of the United States of*  
642 *America*, 96(17), pp. 9695–9700. doi: 10.1073/pnas.96.17.9695.
- 643 Lieberman, D. E. *et al.* (2008) ‘Spatial packing, cranial base angulation, and craniofacial shape  
644 variation in the mammalian skull: Testing a new model using mice’, *Journal of Anatomy*,

- 645 212(6), pp. 720–735. doi: 10.1111/j.1469-7580.2008.00900.x.
- 646 Mackie, E. J. *et al.* (2008) ‘Endochondral ossification: How cartilage is converted into bone in  
647 the developing skeleton’, *International Journal of Biochemistry and Cell Biology*. Int J  
648 Biochem Cell Biol, pp. 46–62. doi: 10.1016/j.biocel.2007.06.009.
- 649 Madeline, L. A. and Elster, A. D. (1995) ‘Suture closure in the human chondrocranium: CT  
650 assessment’, *Radiology*, 196(3), pp. 747–756. doi: 10.1148/radiology.196.3.7644639.
- 651 Marchini, M. *et al.* (2014) ‘Impacts of genetic correlation on the independent evolution of body  
652 mass and skeletal size in mammals’, *BMC Evolutionary Biology*, 14(1), p. 258. doi:  
653 10.1186/s12862-014-0258-0.
- 654 Marchini, M. and Rolian, C. (2018) ‘Artificial selection sheds light on developmental  
655 mechanisms of limb elongation’, *Evolution*, 72(4), pp. 825–837. doi: 10.1111/evo.13447.
- 656 Marongiu, M. *et al.* (2015) ‘FOXL2 modulates cartilage, skeletal development and IGF1-  
657 dependent growth in mice’, *BMC Developmental Biology*, 15(1), p. 27. doi: 10.1186/s12861-  
658 015-0072-y.
- 659 Martínez-Abadías, N. *et al.* (2009) ‘Heritability of human cranial dimensions: Comparing the  
660 evolvability of different cranial regions’, *Journal of Anatomy*, 214(1), pp. 19–35. doi:  
661 10.1111/j.1469-7580.2008.01015.x.
- 662 McBratney-Owen, B. *et al.* (2008) ‘Development and tissue origins of the mammalian cranial  
663 base’, *Developmental Biology*, 322(1), pp. 121–132. doi: 10.1016/j.ydbio.2008.07.016.
- 664 Moss, M. L. (1977) ‘A functional analysis of fusion of the tibia and fibula in the rat and mouse’,  
665 *Cells Tissues Organs*, 97(3), pp. 321–332. doi: 10.1159/000144749.

- 666 Munroe, R. J. *et al.* (2009) ‘Mouse H6 Homeobox 1 (Hmx1) mutations cause cranial  
667 abnormalities and reduced body mass’, *BMC Developmental Biology*, 9(1), p. 27. doi:  
668 10.1186/1471-213X-9-27.
- 669 Murren, C. J. (2012) ‘The integrated phenotype’, in *Integrative and Comparative Biology*. *Integr*  
670 *Comp Biol*, pp. 64–76. doi: 10.1093/icb/ics043.
- 671 Neaux, D. (2016) ‘DomExp: Experimental domestication and skeleton development in captivity  
672 View project’, *Article in American Journal of Physical Anthropology*. doi:  
673 10.1002/ajpa.23163.
- 674 Neaux, D. *et al.* (2019) ‘Morphological integration affects the evolution of midline cranial base,  
675 lateral basicranium, and face across primates’, *American Journal of Physical Anthropology*,  
676 170(1), pp. 37–47. doi: 10.1002/ajpa.23899.
- 677 Parmenter, M. D. *et al.* (2016) ‘Genetics of skeletal evolution in unusually large mice from  
678 gough island’, *Genetics*, 204(4), pp. 1559–1572. doi: 10.1534/genetics.116.193805.
- 679 Parsons, T. E. *et al.* (2011) ‘Epigenetic integration of the developing brain and face’,  
680 *Developmental Dynamics*, 240(10), pp. 2233–2244. doi: 10.1002/dvdy.22729.
- 681 Parsons, T. E. *et al.* (2015) ‘Mind the Gap: Genetic Manipulation of Basicranial Growth within  
682 Synchondroses Modulates Calvarial and Facial Shape in Mice through Epigenetic  
683 Interactions’, *PLOS ONE*. Edited by N. Jeffery, 10(2), p. e0118355. doi:  
684 10.1371/journal.pone.0118355.
- 685 Percival, C. J. *et al.* (2019) ‘The effect of automated landmark identification on morphometric  
686 analyses’, *Journal of Anatomy*, 234(6), pp. 917–935. doi: 10.1111/joa.12973.

- 687 Price, T. and Langen, T. (1992) ‘Evolution of correlated characters’, *Trends in Ecology and*  
688 *Evolution*. Trends Ecol Evol, pp. 307–310. doi: 10.1016/0169-5347(92)90229-5.
- 689 R Core Team (2020) ‘R: A Language and environment for statistical computing (R Foundation  
690 for Statistical Computing).’
- 691 Richtsmeier, J. T. *et al.* (2006) ‘Phenotypic integration of neurocranium and brain’, *Journal of*  
692 *Experimental Zoology Part B: Molecular and Developmental Evolution*, 306(4), pp. 360–378.  
693 doi: 10.1002/jez.b.21092.
- 694 Richtsmeier, J. T. and Flaherty, K. (2013) ‘Hand in glove: Brain and skull in development and  
695 dysmorphogenesis’, *Acta Neuropathologica*. Acta Neuropathol, pp. 469–489. doi:  
696 10.1007/s00401-013-1104-y.
- 697 Riska, B. (1986) ‘Some models for development, growth, and morphometric correlation.’,  
698 *Evolution*, 40(6), pp. 1303–1311. doi: 10.1111/j.1558-5646.1986.tb05753.x.
- 699 Roselló-Díez, A. and Joyner, A. L. (2015) ‘Regulation of long bone growth in vertebrates; It is  
700 time to catch up’, *Endocrine Reviews*. Endocrine Society, pp. 646–680. doi: 10.1210/er.2015-  
701 1048.
- 702 Ross, C. F. and Ravosa, M. J. (1993) ‘Basiscranial flexion, relative brain size, and facial kyphosis  
703 in nonhuman primates’, *American Journal of Physical Anthropology*, 91(3), pp. 305–324. doi:  
704 10.1002/ajpa.1330910306.
- 705 Schlager, S. (2017) ‘Morpho and Rvcg - Shape Analysis in R: R-Packages for Geometric  
706 Morphometrics, Shape Analysis and Surface Manipulations’, in *Statistical Shape and*  
707 *Deformation Analysis: Methods, Implementation and Applications*. Elsevier Inc., pp. 217–

- 708 256. doi: 10.1016/B978-0-12-810493-4.00011-0.
- 709 Schlager, S. (2020) ‘Morpho: calculations and visualizations related to geometric  
710 morphometrics. R package version 2.8.’ Available at: <https://rdrr.io/cran/Morpho/>.
- 711 Schmidt, M. J. *et al.* (2013) ‘COMPARISON OF CLOSURE TIMES FOR CRANIAL BASE  
712 SYNCHONDROSES IN MESATICEPHALIC, BRACHYCEPHALIC, AND CAVALIER  
713 KING CHARLES SPANIEL DOGS’, *Veterinary Radiology & Ultrasound*, 54(5), pp. 497–  
714 503. doi: 10.1111/vru.12072.
- 715 Scott, J. H. (1958) ‘The cranial base’, *American Journal of Physical Anthropology*, 16(3), pp.  
716 319–348. doi: 10.1002/ajpa.1330160305.
- 717 Siegel, M. I. *et al.* (1985) ‘Traction, prenatal development, and the labioseptopremaxillary  
718 region’, *Plastic and Reconstructive Surgery*, 76(1), pp. 25–28. doi: 10.1097/00006534-  
719 198507000-00004.
- 720 Singh, N. *et al.* (2012) ‘Morphological evolution through integration: A quantitative study of  
721 cranial integration in Homo, Pan, Gorilla and Pongo’, *Journal of Human Evolution*, 62(1), pp.  
722 155–164. doi: 10.1016/j.jhevol.2011.11.006.
- 723 Sparrow, L. M. *et al.* (2017) ‘Gait changes in a line of mice artificially selected for longer limbs’,  
724 *PeerJ*, 2017(2). doi: 10.7717/peerj.3008.
- 725 Vora, S. R. (2017) ‘Mouse models for the study of cranial base growth and anomalies’,  
726 *Orthodontics & Craniofacial Research*, 20, pp. 18–25. doi: 10.1111/ocr.12180.
- 727 Vora, S. R., Camci, E. D. and Cox, T. C. (2016) ‘Postnatal Ontogeny of the Cranial Base and  
728 Craniofacial Skeleton in Male C57BL/6J Mice: A Reference Standard for Quantitative



- 729 Analysis', *Frontiers in Physiology*, 6(JAN), p. 417. doi: 10.3389/fphys.2015.00417.
- 730 Wagner, G. P. (1984) 'Coevolution of functionally constrained characters: Prerequisites for  
731 adaptive versatility', *BioSystems*, 17(1), pp. 51–55. doi: 10.1016/0303-2647(84)90015-7.
- 732 Wagner, G. P., Pavlicev, M. and Cheverud, J. M. (2007) 'The road to modularity', *Nature*  
733 *Reviews Genetics*. Nat Rev Genet, pp. 921–931. doi: 10.1038/nrg2267.
- 734 Waters, M. J. and Kaye, P. L. (2002) 'The role of growth hormone in fetal development',  
735 *Growth Hormone and IGF Research*. Churchill Livingstone, pp. 137–146. doi:  
736 10.1016/S1096-6374(02)00018-7.
- 737 Wealthall, R. J. and Herring, S. W. (2006) 'Endochondral ossification of the mouse nasal  
738 septum', *The Anatomical Record Part A: Discoveries in Molecular, Cellular, and*  
739 *Evolutionary Biology*, 288A(11), pp. 1163–1172. doi: 10.1002/ar.a.20385.
- 740 Wei, X. *et al.* (2016) 'Developmental regulation of the growth plate and cranial synchondrosis',  
741 *Journal of Dental Research*, 95(11), pp. 1221–1229. doi: 10.1177/0022034516651823.
- 742 White, A. and Wallis, G. (2001) 'Endochondral ossification: A delicate balance between growth  
743 and mineralisation', *Current Biology*. Cell Press. doi: 10.1016/S0960-9822(01)00359-1.
- 744 Young, B. *et al.* (2006) 'Indian and sonic hedgehogs regulate synchondrosis growth plate and  
745 cranial base development and function', *Developmental Biology*, 299(1), pp. 272–282. doi:  
746 10.1016/j.ydbio.2006.07.028.
- 747 Young, N. M. and Hallgrímsson, B. (2005) 'Serial Homology and The Evolution of Mammalian  
748 Limb Covariation Structure', *Evolution*, 59(12), pp. 2691–2704. doi: 10.1111/j.0014-  
749 3820.2005.tb00980.x.

750 **Table 1** – Longshanks adult (F01, F09, F20) and neonate (F32) sample composition.

| <b>Longshanks Samples (n)</b> |            |            |            |
|-------------------------------|------------|------------|------------|
|                               | <b>CTL</b> | <b>LS1</b> | <b>LS2</b> |
| <b>Generation 1 (F01)</b>     | 24         | 40         | 40         |
| <b>Generation 9 (F09)</b>     | 23         | 40         | 40         |
| <b>Generation 20 (F20)</b>    | 40         | 40         | 40         |
| <b>Generation 32 (F32)</b>    | 32         | 36         | 36         |

751

752

753

754

755

756

757

758

759

760

761

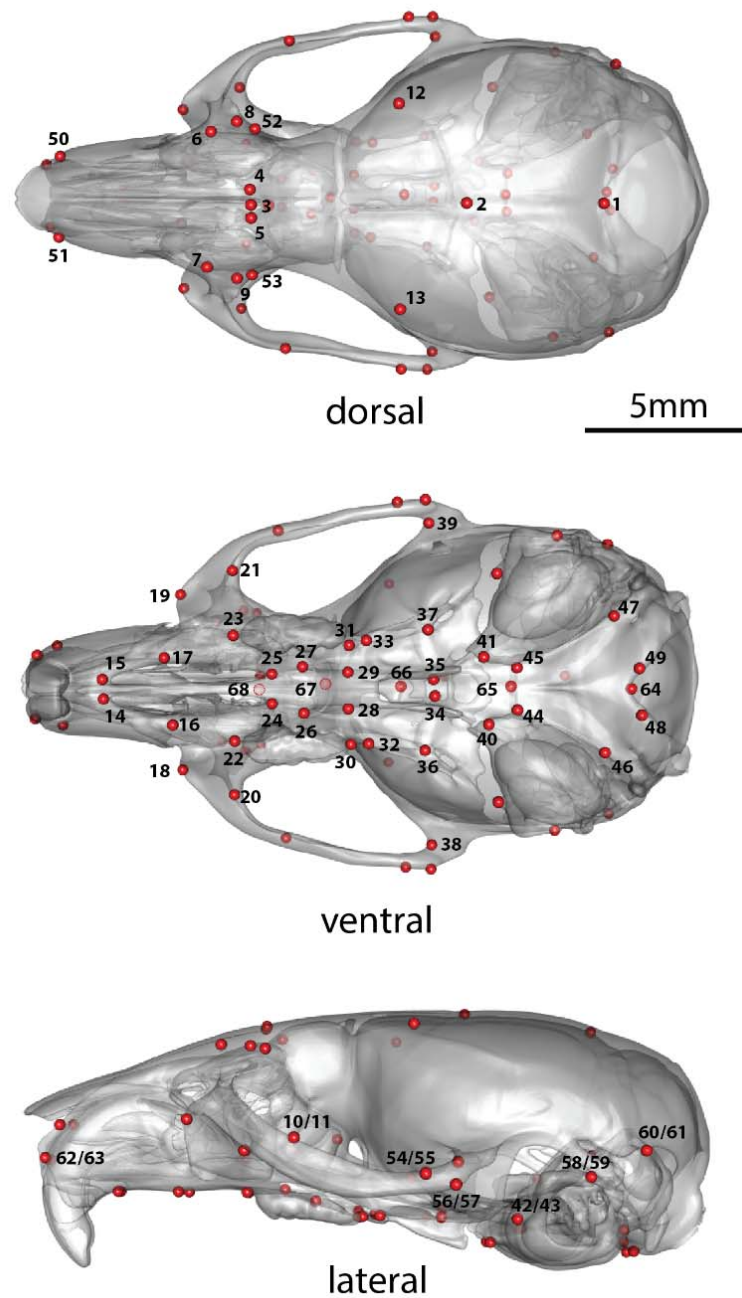

762

763

764 **Supplemental Figure 1** – Adult cranium landmarks used in this study in lateral, dorsal and

765 ventral landmark views. For landmark anatomical definitions, see Supplementary Table 1.

766

767

768

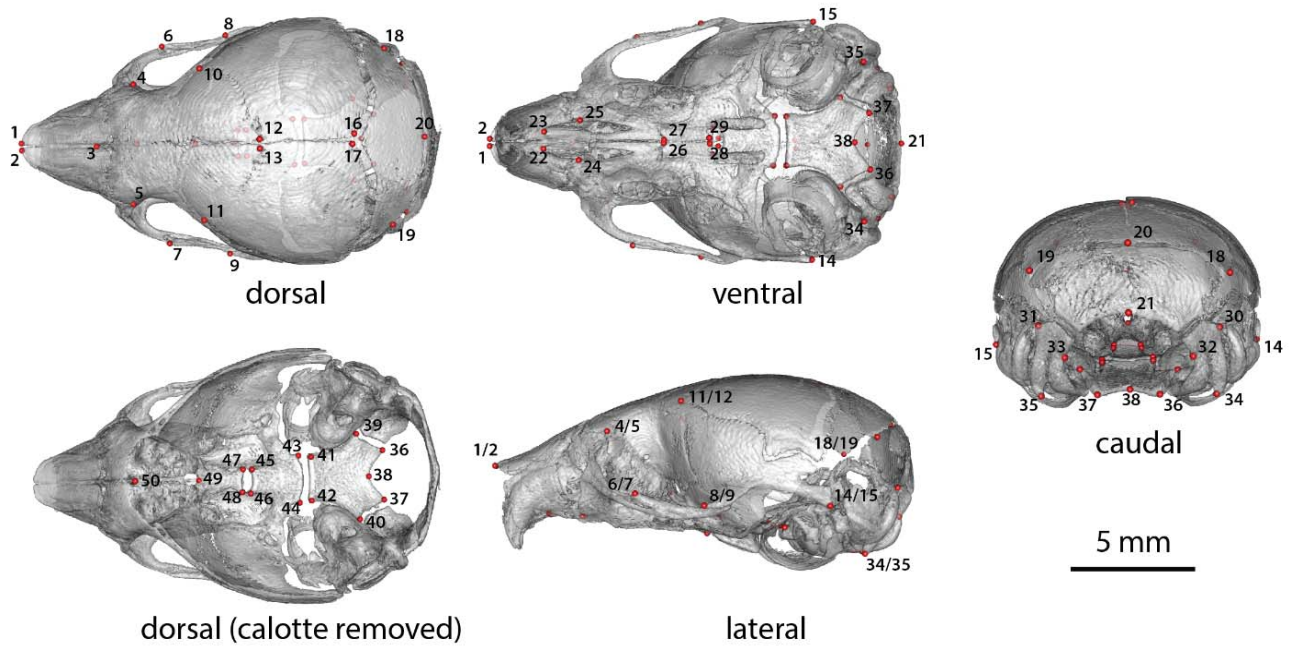

769

770

771 **Supplemental Figure 2** – Neonate (P07) cranium landmarks used in this study in lateral, dorsal,  
772 dorsal cranial base, caudal and ventral landmark views. For landmark anatomical definitions, see  
773 Supplementary Table 2.

774

775

776

777

778

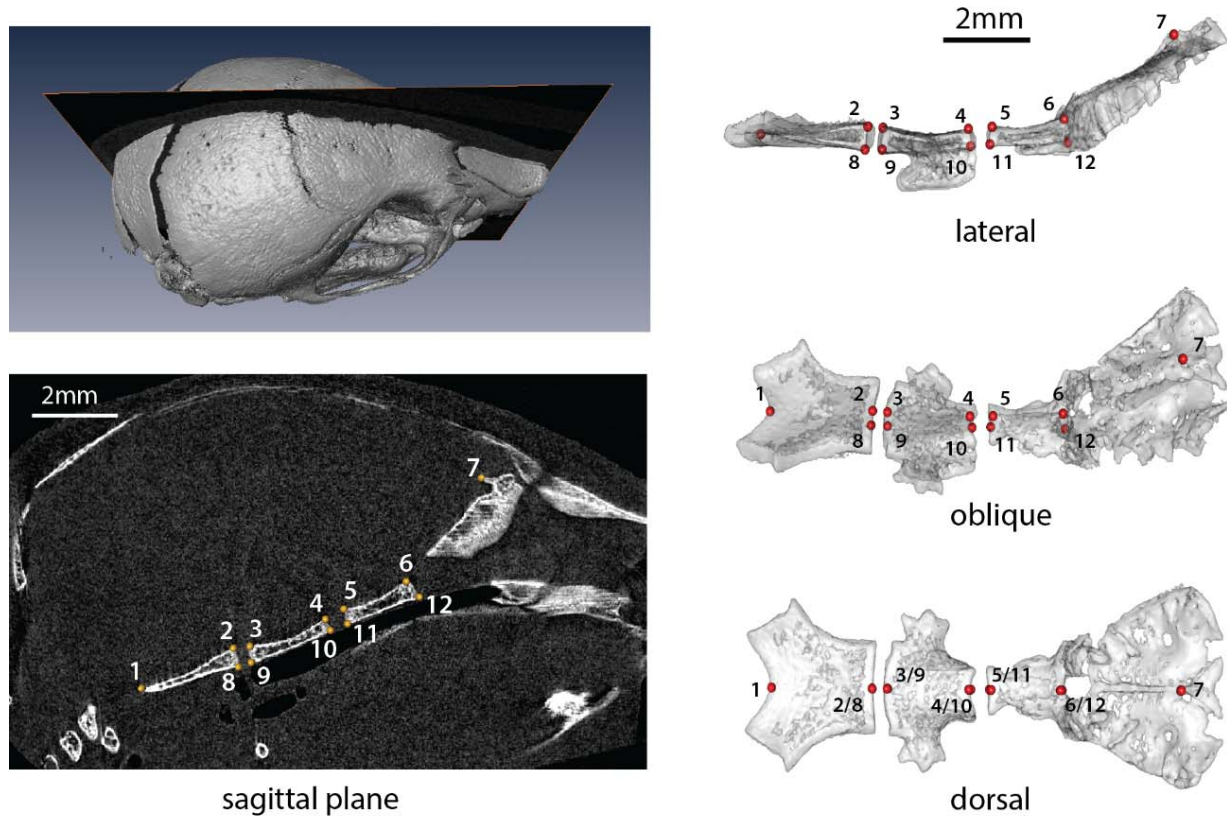

779

780 **Supplemental Figure 3** – Neonate (P07) cranial base landmarks on the sagittal midline used in  
781 this study. Numbered landmarks applied to CT scan reconstruction slices at the midline (left) and  
782 landmarks numbered on a 3D cranial base mesh (right). For landmark anatomical definitions, see  
783 Supplementary Table 3.

784

785

786

787

788

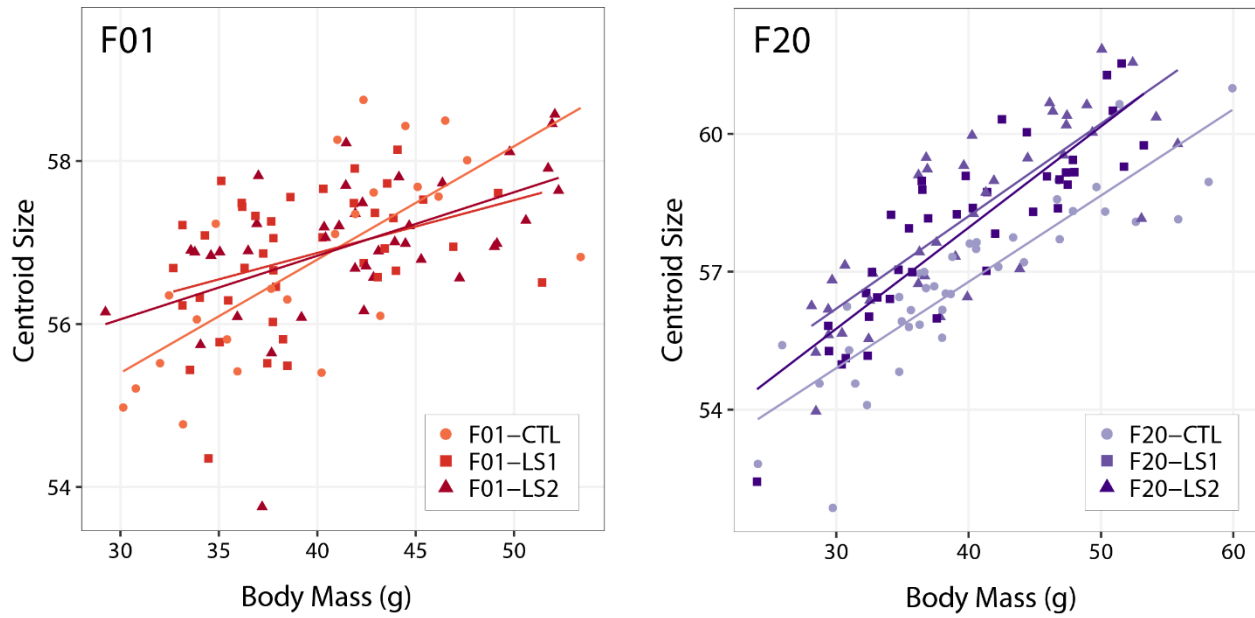

789

790

791 **Supplemental Figure 4** – Scatter plots with regression lines by group showing the relationships

792 between body mass and cranium size (centroid size) in adult founder mice (F01) and after 20

793 generations of selection (F20).

794

795

796

797

798

799

800

801

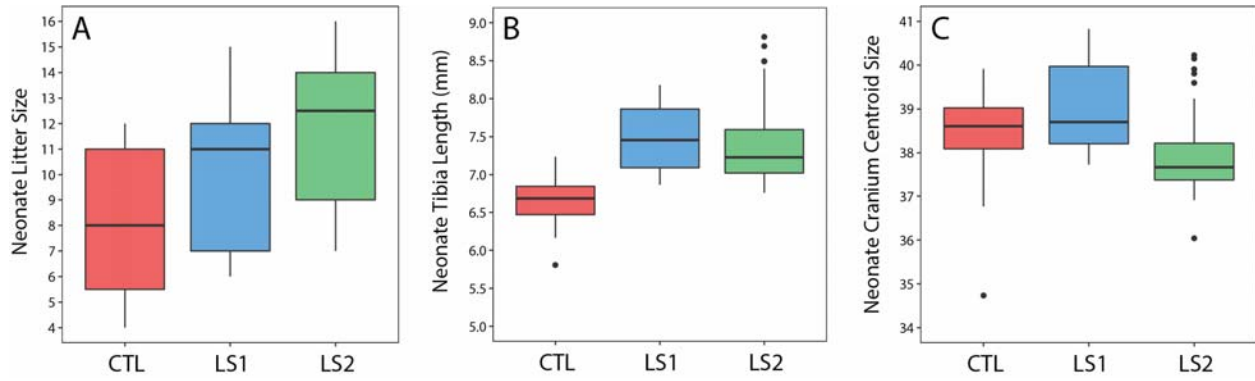

802

803

804 **Supplemental Figure 5** - Boxplots showing differences in neonate Longshanks and Control

805 metrics. (A) Boxplot of neonate litter sizes. (B and C) Boxplots of litter size adjusted tibia length

806 and cranium centroid size.

807

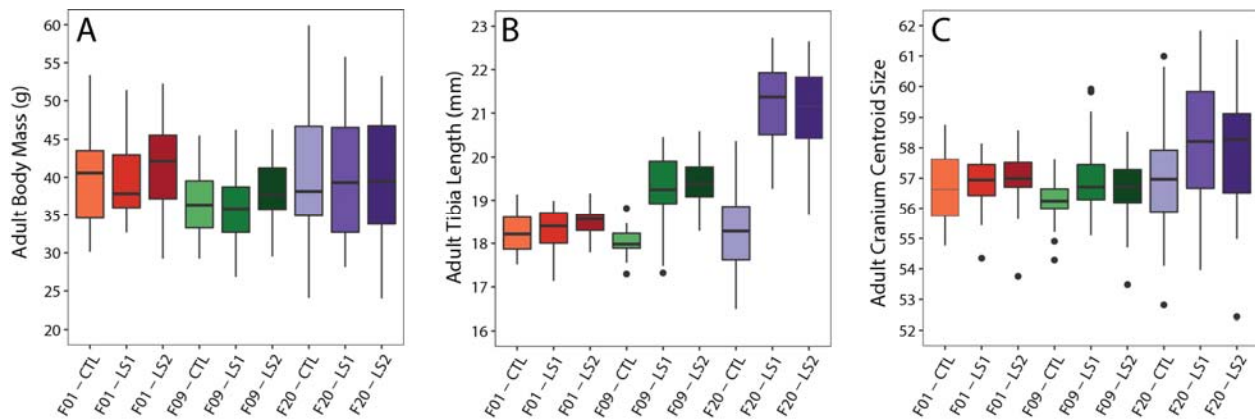

808

809

810 **Supplemental Figure 6** - Boxplots showing differences in adult Longshanks and Control

811 metrics. (A-C) Boxplots of adult body mass, tibia length and cranial centroid size between

812 groups.

813

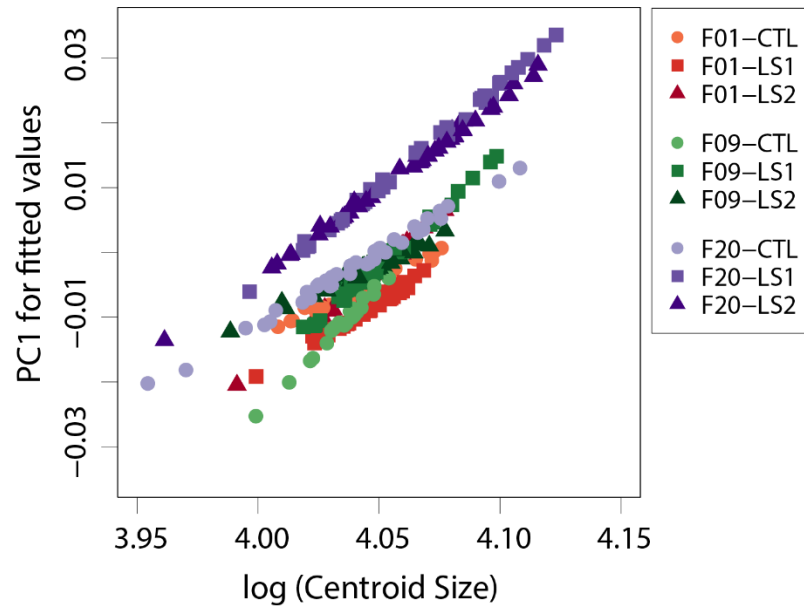

814

815 **Supplemental Figure 7** – Scatter plot of fitted PC1 scores (shape scores predicted by regression  
816 of shape on size) vs log (centroid size) showing within group patterns of cranium allometry. At  
817 any given cranium size, LS1 and LS2 are predicted to have positive shape scores (longer and  
818 narrower) shapes.

819

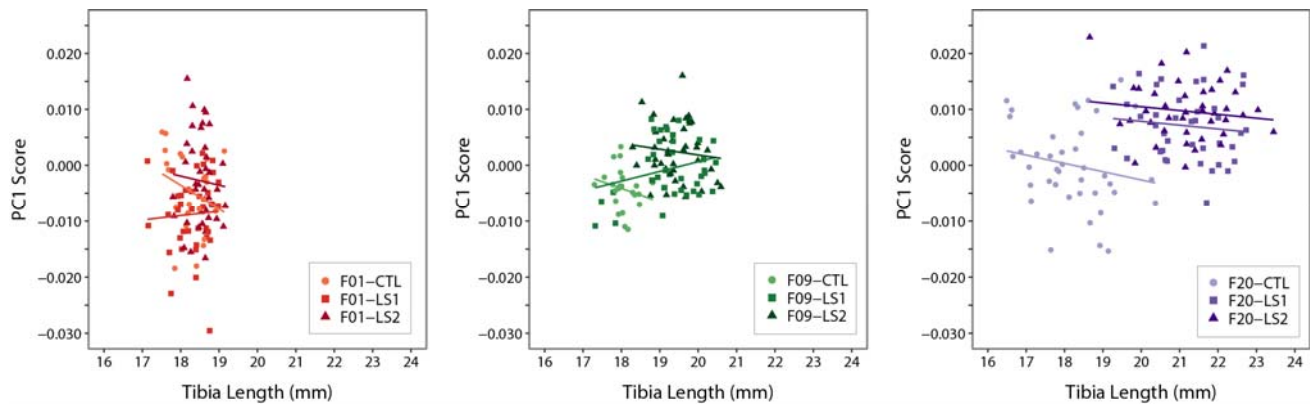

820

821 **Supplemental Figure 8** - Scatter plots with regression lines by group showing the relationships  
822 between PC1 score (cranium shape) and tibia length in adult mice throughout selection.

823



824 Table S1 – Adult cranium landmarks and their anatomical definitions.

| <b>Adult Cranium Landmarks</b>        |       |
|---------------------------------------|-------|
| <b>Paired Landmarks (R/L)</b>         |       |
| Lateral point on frontal suture       | 4/5   |
| Lateral zygomatic-frontal suture      | 6/7   |
| Posterior zygomaticofrontal junction  | 8/9   |
| Posterior margin of malar process     | 10/11 |
| Frontal-temporal-parietal junction    | 12/13 |
| Anterior margin of incisive foramen   | 14/15 |
| Medial maxilla-premaxilla junction    | 16/17 |
| Anterior inferior zygomatic           | 18/19 |
| Anterior temporo-zygomatic junction   | 20/21 |
| Anterior superior alveoli             | 22/23 |
| Posterior incisive foramen            | 24/25 |
| Point along palatine-maxillary suture | 26/27 |
| Medial palatal-pterygoid junction     | 28/29 |
| Posterior superior alveoli            | 30/31 |
| Lateral palatal-pterygoid junction    | 32/33 |
| Spheno-occipital synchondrosis        | 34/35 |
| Anterior foramen ovale                | 36/37 |
| Posterior temporo-zygomatic junction  | 38/39 |
| Auditory-temporal-sphenoid junction   | 40/41 |
| Anterior inferior auditory bulla      | 42/43 |
| Occipital-auditory-sphenoid junction  | 44/45 |
| Point along occipitomastoid suture    | 46/47 |
| Medial occipital condyle              | 48/49 |
| Anterior nasal and premaxilla         | 50/51 |
| Frontal suture on orbital rim         | 52/53 |
| Superior temporo-zygomatic suture     | 54/55 |
| Posterior zygomatic process           | 56/57 |
| Superio-posterior tympanic ring       | 58/59 |

|                                             |       |
|---------------------------------------------|-------|
| Occipital-auditory junction                 | 60/61 |
| Midline superior incisor                    | 62/63 |
| <b>Midline Landmarks</b>                    |       |
| Lambda                                      | 1     |
| Bregma                                      | 2     |
| Nasion                                      | 3     |
| Anterior foramen magnum                     | 64    |
| Midline junction basioccipital and sphenoid | 65    |
| Midline junction sphenoid and presphenoid   | 66    |
| Anterior junction endocranial presphenoid   | 67    |
| Endocranial junction frontal and ethmoid    | 68    |

825

826 Table S2 – Neonate cranium landmarks and their anatomical definitions.

|                                                                            |       |
|----------------------------------------------------------------------------|-------|
| <b>Neonate Cranium Landmarks</b>                                           |       |
| <b>Paired Landmarks (L/R)</b>                                              |       |
| Medial rostral tip of nasal bones                                          | 1/2   |
| Caudal dorsal fronto-zygomatic suture on frontal bone                      | 4/5   |
| Rostral dorsal zygomatic suture on zygomatic bone                          | 6/7   |
| Caudal dorsal zygomatic suture on zygomatic process of temporal bone       | 8/9   |
| Temporal-parietal-frontal suture                                           | 10/11 |
| Caudal medial tip of frontal bones (bregma)                                | 12/13 |
| Ventral caudal tip of occipital process of temporal bone                   | 14/15 |
| Caudal medial tip of the parietal                                          | 16/17 |
| Caudal lateral tip of interparietal                                        | 18/19 |
| Rostral incisor foramen                                                    | 22/23 |
| Premaxilla-maxilla suture (rostral medial maxilla)                         | 24/25 |
| Maxilla-palatine suture (rostral medial palatine)                          | 26/27 |
| Caudal medial tip of palatine                                              | 28/29 |
| Dorsal lateral tip of exoccipital                                          | 30/31 |
| Medial border of exoccipital at widest mediolateral span of foramen magnum | 32/33 |
| Ventral tip of paraoccipital process                                       | 34/35 |
| Caudal medial tip of basioccipital at intra-occipital synchondrosis        | 36/37 |

|                                                                      |       |
|----------------------------------------------------------------------|-------|
| Caudal lateral tip of basioccipital at intra-occipital synchondrosis | 39/40 |
| Rostral lateral tip of basioccipital at sphenoccipital synchondrosis | 41/42 |
| Caudal lateral tip of sphenoid at sphenoccipital synchondrosis       | 43/44 |
| Rostral lateral tip of sphenoid at intersphenoidal synchondrosis     | 45/46 |
| Caudal lateral tip of presphenoid at intersphenoidal synchondrosis   | 47/48 |
| <b>Midline Landmarks</b>                                             |       |
| Caudal medial nasal bones (nasion)                                   | 3     |
| Caudal medial border of interparietal                                | 20    |
| Ventral medial occipital (dorsal foramen magnum)                     | 21    |
| Caudal medial border of basioccipital (rostral foramen magnum)       | 38    |
| Ethmoid-presphenoid suture                                           | 49    |
| Rostral medial border of cribriform plate                            | 50    |

827

828

829

830

831

832

833

834

835

836 Table S3 – Neonate cranial base landmarks and their anatomical definitions.

| <b>Sagittal Midline Neonate Cranial Base Landmarks</b>                  |    |
|-------------------------------------------------------------------------|----|
| Basion                                                                  | 1  |
| Rostral dorsal tip of basi-occipital at spheno-occipital synchondrosis  | 2  |
| Caudal dorsal tip of basi-sphenoid at spheno-occipital synchondrosis    | 3  |
| Rostral dorsal tip of basi-sphenoid at intersphenoidal synchondrosis    | 4  |
| Caudal dorsal tip of presphenoid at intersphenoidal synchondrosis       | 5  |
| Ethmoid-presphenoid suture                                              | 6  |
| Rostral medial border of cribriform plate                               | 7  |
| Rostral ventral tip of basi-occipital at spheno-occipital synchondrosis | 8  |
| Caudal ventral tip of basi-sphenoid at spheno-occipital synchondrosis   | 9  |
| Rostral ventral tip of basi-sphenoid at intersphenoidal synchondrosis   | 10 |
| Caudal ventral tip of presphenoid at intersphenoidal synchondrosis      | 11 |
| Rostral ventral tip of the presphenoid                                  | 12 |

837

838 Table S4 – Morphometric data for neonate mice among lines and generations. Data represents least  
 839 squared means (SEM). Superscripts denote significant differences in means ( $p < 0.05$ ) between a given  
 840 group and: Controls<sup>CTL</sup>, Longshanks Line 1<sup>LS1</sup>, Longshanks Line 2<sup>LS2</sup>.

| <b>Neonate Morphometric Data</b>      |                                 |                                  |                             |
|---------------------------------------|---------------------------------|----------------------------------|-----------------------------|
| Line                                  | CTL                             | LS1                              | LS2                         |
| Ossified Tibial Diaphysis Length (mm) | 6.66 (0.06) <sup>LS1, LS2</sup> | 7.50 (0.07) <sup>CTL</sup>       | 7.41 (0.10) <sup>CTL</sup>  |
| Litter Size                           | 7.94 (0.55) <sup>LS1, LS2</sup> | 10.33 (0.51) <sup>CTL</sup>      | 11.83 (0.51) <sup>CTL</sup> |
| Centroid Size                         | 38.49 (0.17) <sup>LS1</sup>     | 39.05 (0.16) <sup>CTL, LS2</sup> | 37.94 (0.16) <sup>LS1</sup> |

841 Table S5 – Morphometric data for adult mice among lines and generations. Body mass data represent  
 842 means and SEM, whereas centroid size and tibia length are least squared means and SEM. Superscripts  
 843 denote significant differences in means ( $p < 0.05$ ) between a given group and: Controls <sup>CTL</sup>, Longshanks  
 844 Line 1 <sup>LS1</sup>, Longshanks Line 2 <sup>LS2</sup>, from either: Generation 1 <sup>F01</sup>, Generation 9 <sup>F09</sup>, or Generation 20 <sup>F20</sup>.  
 845 Bold and italic superscripts indicate significant intergenerational differences and intragenerational  
 846 differences, respectively.

| Adult Body Mass (g) |                                 |              |                                          |
|---------------------|---------------------------------|--------------|------------------------------------------|
| Generation          | CTL                             | LS1          | LS2                                      |
| F01                 | 39.61 (1.28)                    | 39.25 (0.99) | 42.13 (0.99) <sup>F09 CTL, F09 LS2</sup> |
| F09                 | 36.54 (1.30) <sup>F01 LS2</sup> | 35.91 (0.99) | 38.33 (0.99) <sup>F01 LS2</sup>          |
| F20                 | 40.05 (0.99)                    | 39.89 (0.99) | 39.81 (0.99)                             |

847

| Adult Tibia Length (mm) |                                          |                                                   |                                                   |
|-------------------------|------------------------------------------|---------------------------------------------------|---------------------------------------------------|
| Generation              | CTL                                      | LS1                                               | LS2                                               |
| F01                     | 18.21 (0.12)                             | 18.32 (0.09) <sup>F09-LS1, F20-LS1</sup>          | 18.30 (0.09) <sup>F09-LS2, F20-LS2</sup>          |
| F09                     | 18.23 (0.12) <sup>F09-LS1, F09-LS2</sup> | 19.51 (0.09) <sup>F01-LS1, F20-LS1, F09-CTL</sup> | 19.50 (0.09) <sup>F01-LS2, F20-LS2, F09-CTL</sup> |
| F20                     | 18.13 (0.09) <sup>F20-LS1, F20-LS2</sup> | 21.13 (0.09) <sup>F01-LS1, F09-LS1, F20-CTL</sup> | 21.15 (0.09) <sup>F01-LS2, F09-LS2, F20-CTL</sup> |

848

| Adult Cranial Centroid Size |                                          |                                                   |                                                   |
|-----------------------------|------------------------------------------|---------------------------------------------------|---------------------------------------------------|
| Generation                  | CTL                                      | LS1                                               | LS2                                               |
| F01                         | 56.66 (0.19)                             | 56.81 (0.15) <sup>F20-LS1</sup>                   | 56.51 (0.15) <sup>F20-LS2</sup>                   |
| F09                         | 56.64 (0.19)                             | 57.49 (0.15) <sup>F20-LS1</sup>                   | 56.82 (0.15) <sup>F20-LS2</sup>                   |
| F20                         | 56.64 (0.15) <sup>F20-LS1, F20-LS2</sup> | 58.07 (0.15) <sup>F01-LS1, F09-LS1, F20-CTL</sup> | 57.81 (0.15) <sup>F01-LS2, F09-LS2, F20-CTL</sup> |

849

850 Supplementary Table S6: Euclidean distance between the multivariate mean PC scores of each  
 851 group, based on Procrustes shape data adjusted for sex only (above diagonal), or sex and cranial  
 852 centroid size (below diagonal). The only non-significant Euclidean distance, based on a post-hoc  
 853 Procrustes ANCOVA, is indicated in bold.

|                                                   |         | <b>Mean PC scores adjusted for sex only</b> |         |              |         |         |         |         |         |         |
|---------------------------------------------------|---------|---------------------------------------------|---------|--------------|---------|---------|---------|---------|---------|---------|
|                                                   |         | F01-CTL                                     | F01-LS1 | F01-LS2      | F09-CTL | F09-LS1 | F09-LS2 | F20-CTL | F20-LS1 | F20-LS2 |
| Mean PC scores adjusted for centroid size and sex | F01-CTL | -                                           | 0.010   | <b>0.007</b> | 0.012   | 0.013   | 0.015   | 0.010   | 0.022   | 0.023   |
|                                                   | F01-LS1 | 0.011                                       | -       | 0.011        | 0.014   | 0.016   | 0.018   | 0.014   | 0.025   | 0.026   |
|                                                   | F01-LS2 | <b>0.007</b>                                | 0.011   | -            | 0.012   | 0.011   | 0.013   | 0.009   | 0.020   | 0.020   |
|                                                   | F09-CTL | 0.011                                       | 0.014   | 0.010        | -       | 0.012   | 0.012   | 0.013   | 0.027   | 0.026   |
|                                                   | F09-LS1 | 0.013                                       | 0.016   | 0.011        | 0.010   | -       | 0.011   | 0.014   | 0.020   | 0.021   |
|                                                   | F09-LS2 | 0.015                                       | 0.018   | 0.013        | 0.011   | 0.011   | -       | 0.013   | 0.023   | 0.018   |
|                                                   | F20-CTL | 0.010                                       | 0.014   | 0.010        | 0.012   | 0.014   | 0.013   | -       | 0.021   | 0.019   |
|                                                   | F20-LS1 | 0.016                                       | 0.020   | 0.015        | 0.018   | 0.015   | 0.018   | 0.015   | -       | 0.015   |
|                                                   | F20-LS2 | 0.018                                       | 0.022   | 0.016        | 0.019   | 0.018   | 0.013   | 0.014   | 0.015   | -       |

854

855
